# Supplementary material for: Eicosapentaenoic acid activates the P62/KEAP1/NRF2 pathway for the prevention of diabetes-associated cognitive dysfunction
Source: Royal Society of Chemistry journal article supplement (doi:10.1039/d4fo00774c), 2024-01-01
Supplement: d4fo00774c1.pdf [file d4fo00774c1.pdf]

Figure S1

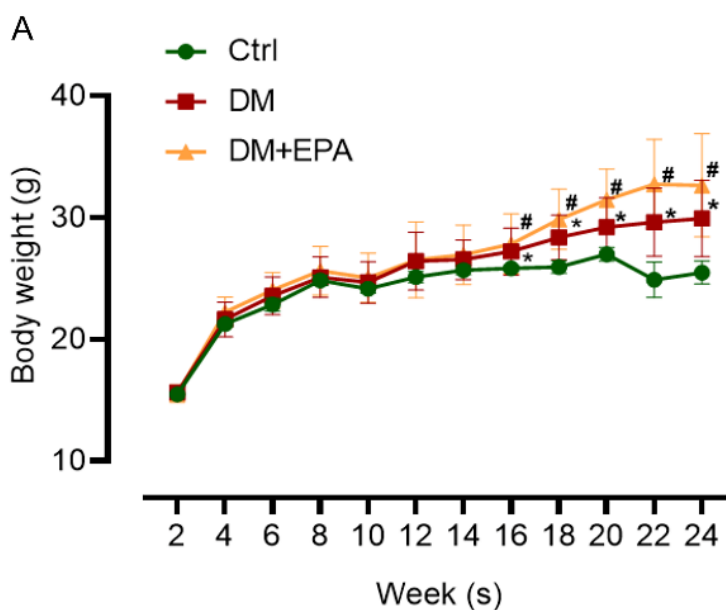

**Figure S1. EPA increased body weight in the diabetic mice.** (A) Body weight of mice. The data were summarized as means  $\pm$  SD (n=6). \* $P$ <0.05 vs. Ctrl; # $P$ <0.05 vs. DM. Abbreviations: Ctrl, control; DM, diabetes mellitus; EPA, eicosapentaenoic acid.

Figure S2

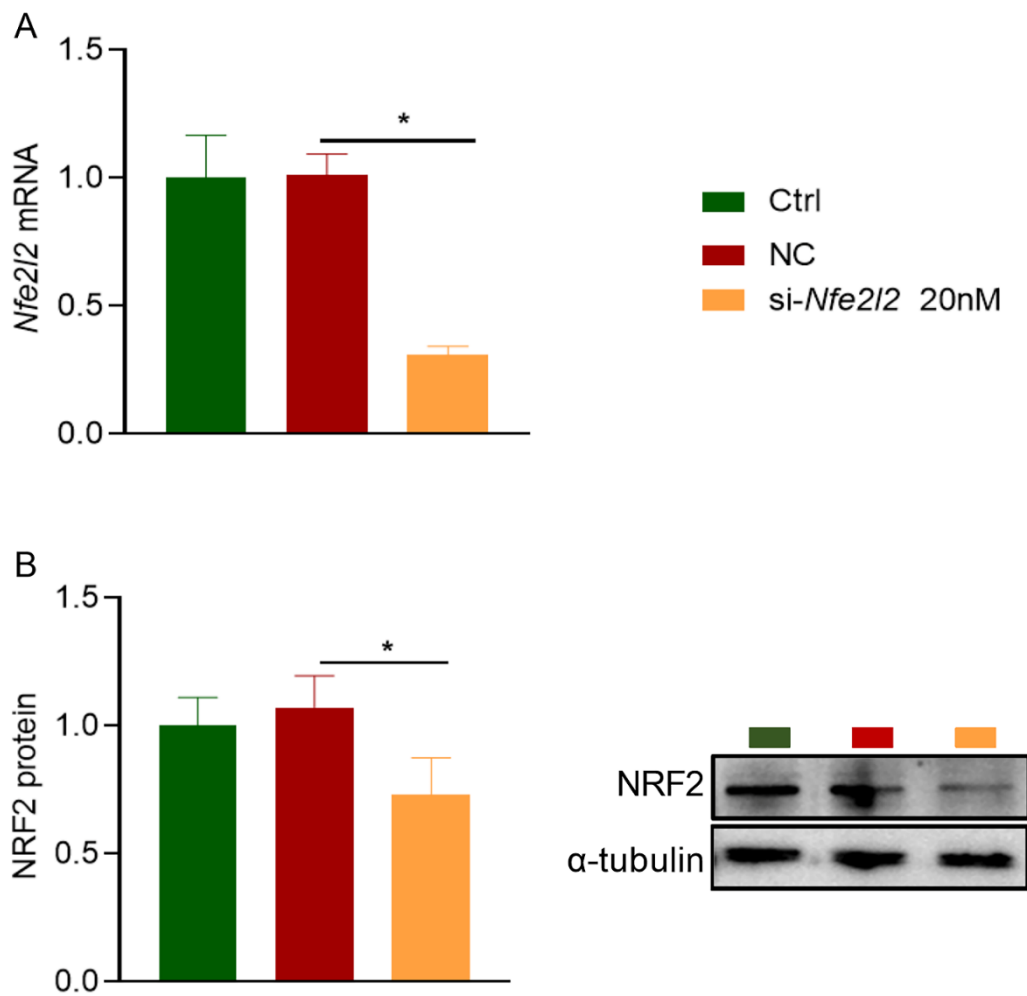

**Figure S2. Validation of the efficacy of *Nfe2l2* small interfering RNA.** (A) mRNA levels of *Nfe2l2*; (B) protein levels of NRF2. \* $P < 0.05$  vs. NC. The data were summarized as means  $\pm$  SD (n=3). Abbreviations: NC, negative control; NRF2, NFE2 like bZIP transcription factor 2; si-*Nfe2l2*, *Nfe2l2*-siRNA.

Figure S3

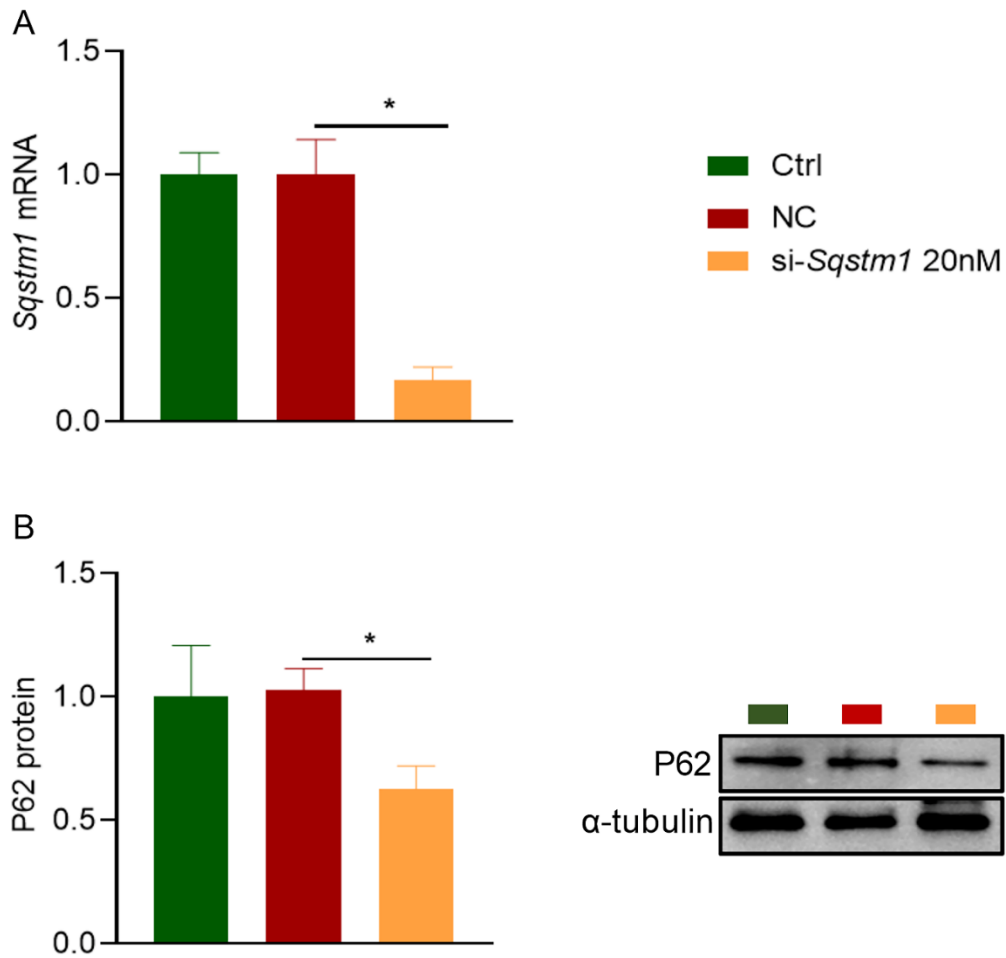

**Figure S3. Validation of the efficacy of *Sqstm1* small interfering RNA.** (A) mRNA levels of *Sqstm1*; (B) protein levels of P62; \* $P < 0.05$  vs. NC. P62/*Sqstm1*, sequestosome 1. The data were summarized as means  $\pm$  SD (n=3). Abbreviations: si-*Sqstm1*, *Sqstm1*-siRNA. Other abbreviations are the same as in Figure S2.

Figure S4

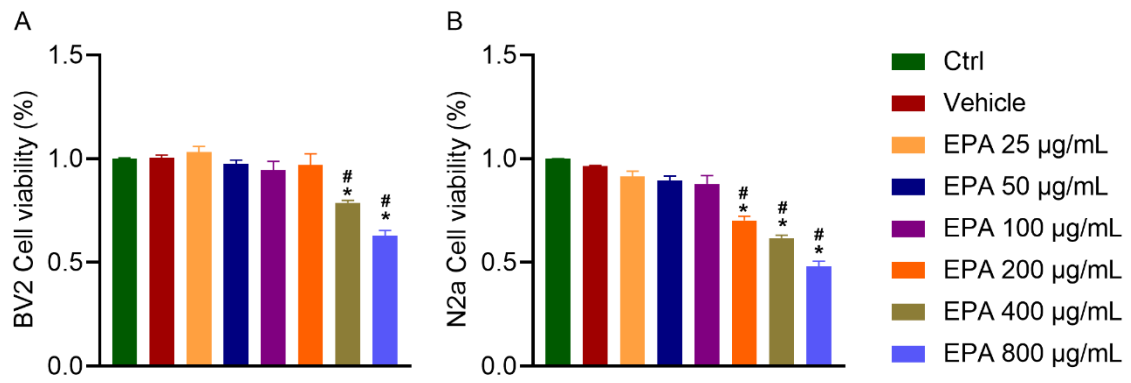

**Figure S4. Cell viability test.** (A) Viability of BV2 cells treated with EPA; (B) Viability of N2a cells treated with EPA; \* $P < 0.05$  vs. Ctrl; # $P < 0.05$  vs. Vehicle. The data were summarized as means  $\pm$  SD (n=3). Abbreviations: Vehicle, dimethyl sulfoxide.

**Table S1. Composition of the experimental diets**

| <b>Ingredient (g/kg)</b>           | <b>Normal diet</b> | <b>HFD diet</b> | <b>HFD+EPA diet</b> |
|------------------------------------|--------------------|-----------------|---------------------|
| Soybean                            | 70                 | 70              | 65                  |
| EPA                                | -                  | -               | 5                   |
| Lard                               | -                  | 230             | 230                 |
| $\beta$ -cornstarch                | 397.49             | 110.62          | 110.62              |
| $\alpha$ -(dextrinized) cornstarch | 132                | 36.87           | 36.87               |
| Casein                             | 200                | 250             | 250                 |
| Sucrose                            | 100                | 200             | 200                 |
| AIN-93 mineral mixture             | 35                 | 35              | 35                  |
| AIN-93 vitamin mixture             | 10                 | 10              | 10                  |
| L-Cystine                          | 3                  | 3.75            | 3.75                |
| Choline bitartrate                 | 2.5                | 2.5             | 2.5                 |
| Cellulose                          | 50                 | 50              | 50                  |
| Tert-Butylhydroquinone             | 0.01               | 0.06            | 0.06                |
| Cholesterol                        | -                  | 1.2             | 1.2                 |
| Protein                            | 203                | 253.75          | 253.75              |
| Carbohydrates                      | 629.49             | 347.49          | 347.49              |
| Fat                                | 70                 | 300             | 300                 |

**Table S2. Antibodies used for Western Blot**

| <b>Abbreviation</b> | <b>Full Name</b>                                    | <b>Agent</b>              |
|---------------------|-----------------------------------------------------|---------------------------|
| BCL2                | B-cell lymphoma-2                                   | Proteintech               |
| BAX                 | BCL2 Associated X Protein                           | Proteintech               |
| cleaved Caspase3    | Cleaved cysteine aspartate-specific protease3       | Proteintech               |
| Iba1                | allograft inflammatory factor1                      | Cell Signaling Technology |
| Cox2                | cytochrome c oxidase subunit 2                      | Cell Signaling Technology |
| IL-1 $\beta$        | interleukin 1 $\beta$                               | Cell Signaling Technology |
| IL-6                | interleukin 6                                       | Proteintech               |
| NOX4                | NADPH oxidase 4                                     | Proteintech               |
| p-JNK               | phospho-c-Jun N-terminal kinase                     | Cell Signaling Technology |
| JNK                 | c-Jun N-terminal kinase                             | Cell Signaling Technology |
| Neun                | neuron specific nuclear protein                     | Cell Signaling Technology |
| p-ERK               | phospho-extracellular regulated MAP kinase          | Cell Signaling Technology |
| ERK                 | extracellular regulated MAP kinase                  | Cell Signaling Technology |
| p-P65               | phosphor-RELA proto-oncogene NF-kB subunit          | Affinity                  |
| P65                 | RELA proto-oncogene NF-kB subunit                   | Affinity                  |
| P62                 | sequestosome-1                                      | Cell Signaling Technology |
| iNOS                | inducible nitric oxide synthase                     | Cell Signaling Technology |
| NRF2                | nuclear factor erythroid 2-related factor 2         | Proteintech               |
| HO1                 | heme oxygenase 1                                    | Proteintech               |
| NQO1                | NAD(P)H quinone dehydrogenase1                      | Santa Cruz Biotechnology  |
| KEAP1               | Kelch-like ECH-associated protein 1                 | Santa Cruz Biotechnology  |
| $\alpha$ -tubulin   | Alpha Tubulin                                       | Proteintech               |
| Secondary Antibody  | UltraPolymer Goat anti-Mouse IgG (H&L)-HRP          | Proteintech               |
| Secondary Antibody  | UltraPolymer Goat anti-Rabbit IgG (H&L)-HRP         | Proteintech               |
| Secondary Antibody  | Alexa Fluor® 488 Labeled Goat Anti-Rabbit IgG (H+L) | ZSGB-BIO                  |
| Secondary Antibody  | Alexa Fluor® 594 Labeled Goat Anti-Mouse IgG (H+L)  | ZSGB-BIO                  |
| Secondary Antibody  | Alexa Fluor® 594 Labeled Goat Anti-Rabbit IgG (H+L) | ZSGB-BIO                  |

**Table S3. Sequences of primers and si-RNA**

| <b>Gene name</b>          | <b>Gene ID</b> | <b>Sequence</b>             |
|---------------------------|----------------|-----------------------------|
| <i>Il1α</i> -forward      | 16175          | TTTGACATGTATGCCTACTCGTCGG   |
| <i>Il1α</i> -reverse      | 16175          | CTGTGATGAGTTTTGGTGTCTTCTGGC |
| <i>Il1β</i> -forward      | 16176          | AAATGCCACCTTTTGACAGTGATG    |
| <i>Il1β</i> -reverse      | 16176          | GCAGCCCTTCATCTTTTGGG        |
| <i>Nos2</i> -forward      | 18126          | CAGCTGGGCTGTACAAACCTT       |
| <i>Nos2</i> -reverse      | 18126          | CATTGGAAGTGAAGCGTTTCG       |
| <i>36B4</i> -forward      | 11837          | GGCTGACTTGGTTGCTTTGG        |
| <i>36B4</i> -reverse      | 11837          | AGCAAAGGAAGAGTCGGAGG        |
| <i>Ccl2</i> -forward      | 20296          | TTAAAAACCTGGATCGGAACCAA     |
| <i>Ccl2</i> -reverse      | 20296          | GCATTAGCTTCAGATTTACGGGT     |
| <i>Il6</i> -forward       | 16193          | CCAGGTAGCTATGGTACTCCAGAA    |
| <i>Il6</i> -reverse       | 16193          | GCTACCAAACCTGGATATAATCAGGA  |
| <i>Tnfa</i> -forward      | 21926          | TTGTCTTAATAACGCTGATTTGGT    |
| <i>Tnfa</i> -reverse      | 21926          | GGGAGCAGAGGTTTCAGTGAT       |
| <i>Hmox1</i> -forward     | 15368          | AGGGTCAGGTGTCCAGAGAA        |
| <i>Hmox1</i> -reverse     | 15368          | CTTCCAGGGCCGTGTAGATA        |
| <i>Keap1</i> -forward     | 50868          | AAGGACCTTGTGGAAGACCA        |
| <i>Keap1</i> -reverse     | 50868          | CCCTGTCCACTGGAATTGAT        |
| <i>Nqo1</i> -forward      | 18104          | AGCGTTCGGTATTACGATCC        |
| <i>Nqo1</i> -reverse      | 18104          | AGTACAATCAGGGCTCTTCTCG      |
| <i>Nfe2l2</i> -forward    | 18024          | CATGATGGACTTGGAGTTGC        |
| <i>Nfe2l2</i> -reverse    | 18024          | CCTCCAAAGGATGTCAATCAA       |
| <i>Sqstm1</i> -forward    | 18412          | CCTTGCCCTACAGCTGAGTC        |
| <i>Sqstm1</i> -reverse    | 18412          | TGTTCCACATCAATGTCAACCT      |
| <i>si-Nfe2l2</i> -forward | —              | CGAGAAGUGUUUGACUUUATT       |
| <i>si-Nfe2l2</i> -reverse | —              | UAAAGUCAAACACUUCUCGTT       |
| <i>si-Sqstm1</i> -forward | —              | GGCACAGAAGACAAGAGUATT       |
| <i>si-Sqstm1</i> -reverse | —              | UACUCUUGUCUUCUGUGCCTT       |

negative control siRNA-  
forward

——

UUCUCCGAACGUGUCACGUTT

negative control siRNA-  
reverse

——

ACGUGACACGUUCGGAGAATT

---



**Table S4. Original data table of blood glucose and blood insulin**

| Group   | Blood glucose (mmol/L) |           |           |           |           |           | Blood insulin               |
|---------|------------------------|-----------|-----------|-----------|-----------|-----------|-----------------------------|
|         | 1st month              | 2nd month | 3rd month | 4th month | 5th month | 6th month | ( $\mu$ IU/ml)<br>6th month |
| Ctrl1   | 5.6                    | 8.5       | 12.1      | 6.6       | 7.1       | 4.7       | 3.17                        |
| Ctrl2   | 6.3                    | 6.4       | 8.3       | 5.1       | 7.3       | 8.5       | 2.52                        |
| Ctrl3   | 5.2                    | 6.7       | 10.3      | 7.3       | 6.7       | 6.7       | 3.58                        |
| Ctrl4   | 6.2                    | 9.2       | 8         | 10.5      | 8.4       | 7.4       | 2.98                        |
| Ctrl5   | 5.2                    | 8.9       | 8.3       | 7.3       | 7         | 7         | 3.25                        |
| Ctrl6   | 4.6                    | 8.9       | 7.7       | 8.4       | 6.5       | 8         | 3.09                        |
| DM1     | 21                     | 24        | 23.6      | 17.0      | 21.3      | 25.1      | 5.75                        |
| DM2     | 10.2                   | 22.1      | 27.9      | 18.8      | 23.4      | 23.7      | 5.43                        |
| DM3     | 14.9                   | 22.1      | 27.6      | 19.0      | 25.2      | 26.3      | 5.03                        |
| DM4     | 23.2                   | 19.3      | 22.5      | 12.8      | 23.7      | 26.1      | 3.99                        |
| DM5     | 16.1                   | 22.6      | 23.4      | 23.8      | 22.6      | 26.2      | 5.06                        |
| DM6     | 18.4                   | 21        | 21.2      | 21.8      | 26.4      | 18.9      | 4.78                        |
| DM+EPA1 | 20.6                   | 22.1      | 22.5      | 19.1      | 26.9      | 22.1      | 2.93                        |
| DM+EPA2 | 19.6                   | 23.2      | 24.8      | 12.2      | 25.1      | 21.4      | 3.63                        |
| DM+EPA3 | 16.3                   | 17.7      | 22.8      | 14.9      | 13.1      | 11.2      | 3.21                        |
| DM+EPA4 | 14.2                   | 22.2      | 25.8      | 21.4      | 20        | 16.9      | 3.15                        |
| DM+EPA5 | 23.78                  | 21.5      | 25.4      | 26.0      | 21.9      | 10.4      | 3.89                        |
| DM+EPA6 | 16.4                   | 24.3      | 22.5      | 24.2      | 25.9      | 19.9      | 4.96                        |

**Table S5. Original data table of glucose tolerance test**

| Groups  | 0min | 15min | 30min | 60min | 90min | 120min |
|---------|------|-------|-------|-------|-------|--------|
| Ctrl1   | 6.7  | 15.3  | 11.5  | 8.2   | 7.0   | 8.1    |
| Ctrl2   | 6.4  | 22.0  | 17.0  | 15.3  | 8.4   | 6.8    |
| Ctrl3   | 5.5  | 17.5  | 20.1  | 15.4  | 7.4   | 5.4    |
| Ctrl4   | 5    | 14    | 14.6  | 11.3  | 6.4   | 5      |
| Ctrl5   | 6.4  | 12.2  | 11.8  | 9.7   | 6.2   | 5.6    |
| Ctrl6   | 7.9  | 14.3  | 9.7   | 6.7   | 7.2   | 6.5    |
| DM1     | 7.8  | 14.2  | 20.4  | 15.2  | 14.5  | 8.4    |
| DM2     | 24.4 | 34.3  | 43.5  | 38.9  | 35.3  | 32.5   |
| DM3     | 24.3 | 29.0  | 42.9  | 32.8  | 34.0  | 27.2   |
| DM4     | 24.4 | 34.9  | 46.0  | 39.7  | 37.6  | 31.0   |
| DM5     | 25.6 | 37.3  | 47.0  | 34.0  | 36.2  | 33.1   |
| DM6     | 25.4 | 36.5  | 40.3  | 37.4  | 33.9  | 31.3   |
| DM+EPA1 | 12.1 | 24.0  | 29.9  | 24.5  | 23.6  | 20.3   |
| DM+EPA2 | 5.4  | 21.8  | 26.1  | 14.9  | 18.9  | 14.8   |
| DM+EPA3 | 10.3 | 23.1  | 38.0  | 32.8  | 25.0  | 24.8   |
| DM+EPA4 | 6.1  | 16.1  | 28.3  | 12.0  | 5.7   | 6.9    |
| DM+EPA5 | 15.5 | 36.2  | 19.8  | 26.6  | 27.3  | 22.7   |
| DM+EPA6 | 22.8 | 34.6  | 40.1  | 36.6  | 26.8  | 27.0   |

**Table S6. Original data table of insulin tolerance test**

| Groups  | 0min | 15min | 30min | 60min | 90min | 120min |
|---------|------|-------|-------|-------|-------|--------|
| Ctrl1   | 5.2  | 3     | 2.9   | 2.8   | 2.8   | 2.6    |
| Ctrl2   | 5.1  | 3.2   | 3.5   | 2.6   | 3.2   | 2.8    |
| Ctrl3   | 5.7  | 3.4   | 3.4   | 3.1   | 3.3   | 5      |
| Ctrl4   | 5.5  | 3.6   | 3.2   | 3.5   | 3.3   | 3.4    |
| Ctrl5   | 7.2  | 3.9   | 4.2   | 2.3   | 2.9   | 3.8    |
| Ctrl6   | 8.6  | 5.1   | 5.2   | 3.6   | 3.2   | 4.1    |
| DM1     | 26.3 | 26    | 26.4  | 24.2  | 23.2  | 25.4   |
| DM2     | 25   | 24.7  | 21.8  | 18.8  | 24    | 19     |
| DM3     | 15.6 | 20.7  | 10    | 13.5  | 13.3  | 12.3   |
| DM4     | 10.5 | 12    | 5.8   | 6.5   | 6.2   | 8      |
| DM5     | 13   | 8.3   | 6.7   | 4.7   | 4.8   | 15.8   |
| DM6     | 18.3 | 10    | 8.5   | 3.9   | 4.7   | 21.5   |
| DM+EPA1 | 18   | 16.8  | 9.8   | 5.4   | 4.4   | 4.8    |
| DM+EPA2 | 12.8 | 10.7  | 4.3   | 3.6   | 3.8   | 3.3    |
| DM+EPA3 | 19.1 | 16.4  | 6.3   | 4.1   | 4.1   | 3.8    |
| DM+EPA4 | 18.9 | 17.4  | 9.5   | 3.9   | 4     | 3.4    |
| DM+EPA5 | 15.9 | 15.8  | 5.9   | 4.3   | 3.4   | 3.6    |
| DM+EPA6 | 23.7 | 23.3  | 8.7   | 4.2   | 3.6   | 3.6    |

Figure 3

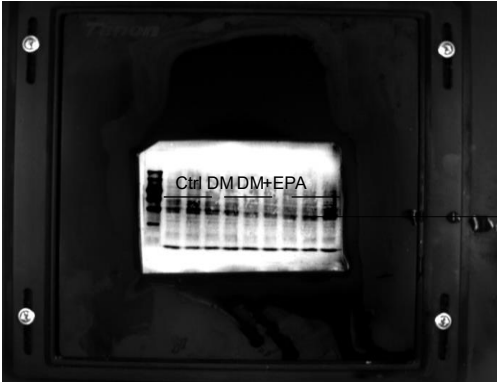

→ Neun (46-55kDa)

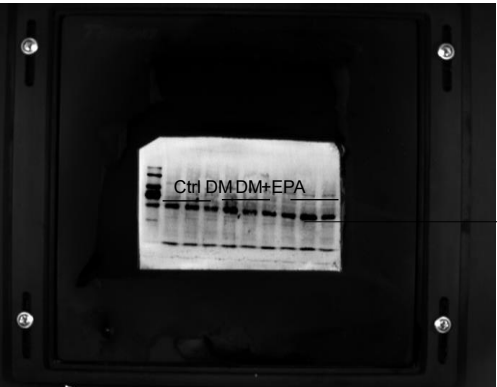

→  $\alpha$ -tubulin for Neun (55kDa)

Figure 4

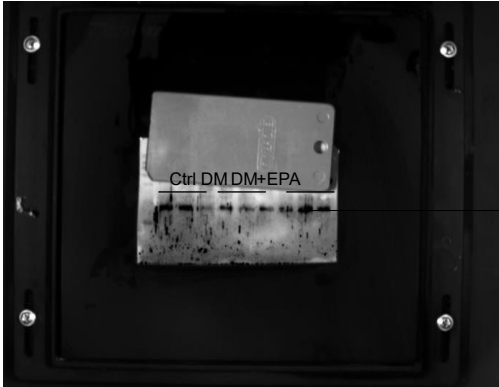

→ BCL2 (26kDa)

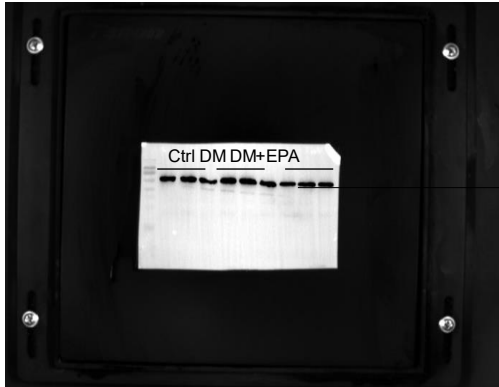

→  $\alpha$ -tubulin for BCL2 (55kDa)

Figure 4

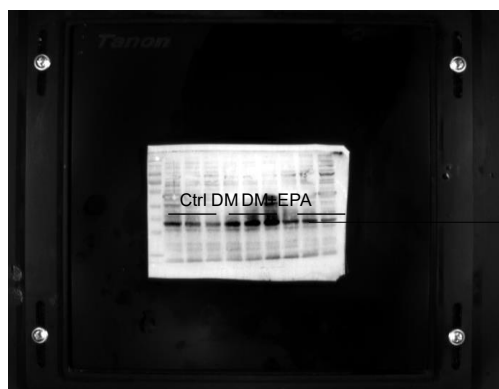

→ BAX (20kDa)

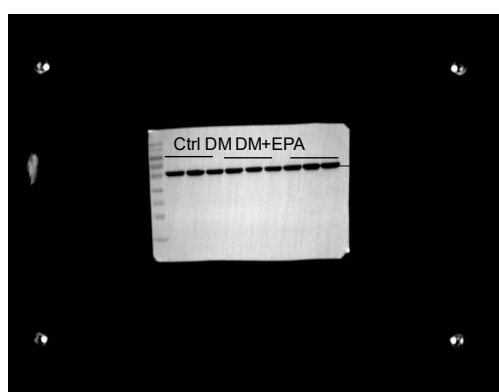

→  $\alpha$ -tubulin for BAX (55kDa)

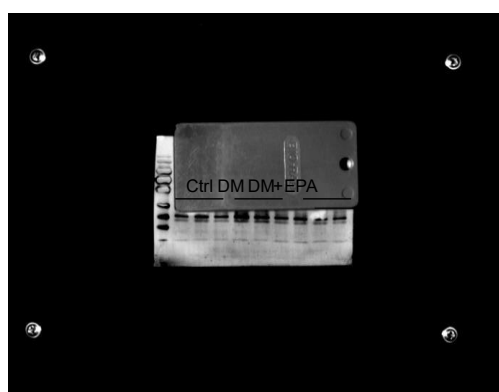

→ cleaved Caspase3  
(17-19kDa)

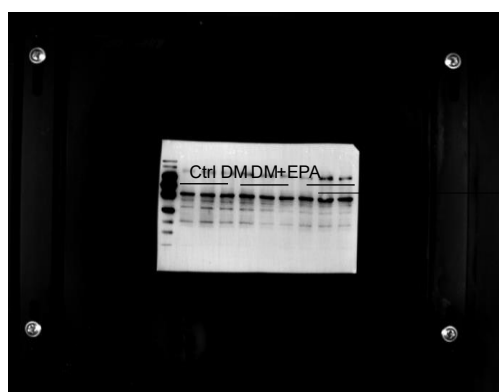

→  $\alpha$ -tubulin for cleaved  
Caspase3 (55kDa)

Figure 4

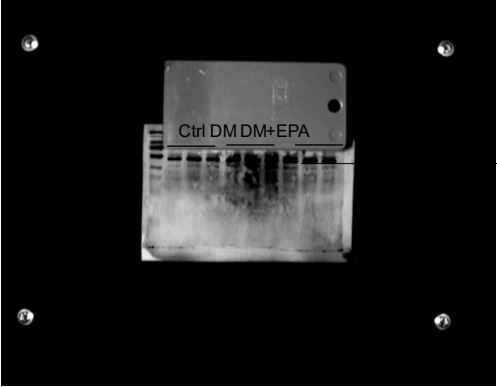

→ IL-1β (17-31kDa)

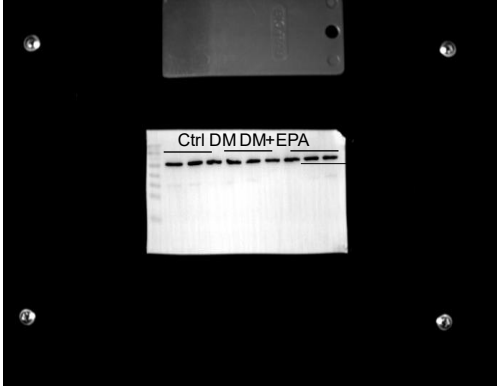

→ α-tubulin for IL-1β (55kDa)

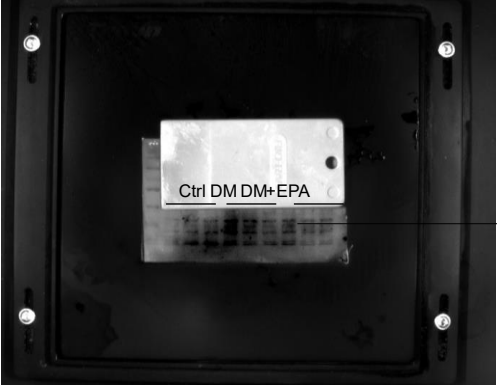

→ IL-6 (24kDa)

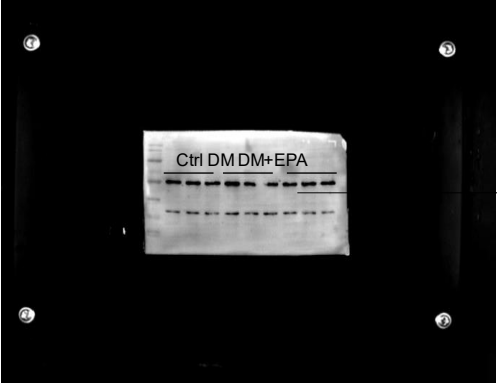

→ α-tubulin for IL6 (55kDa)

Figure 4

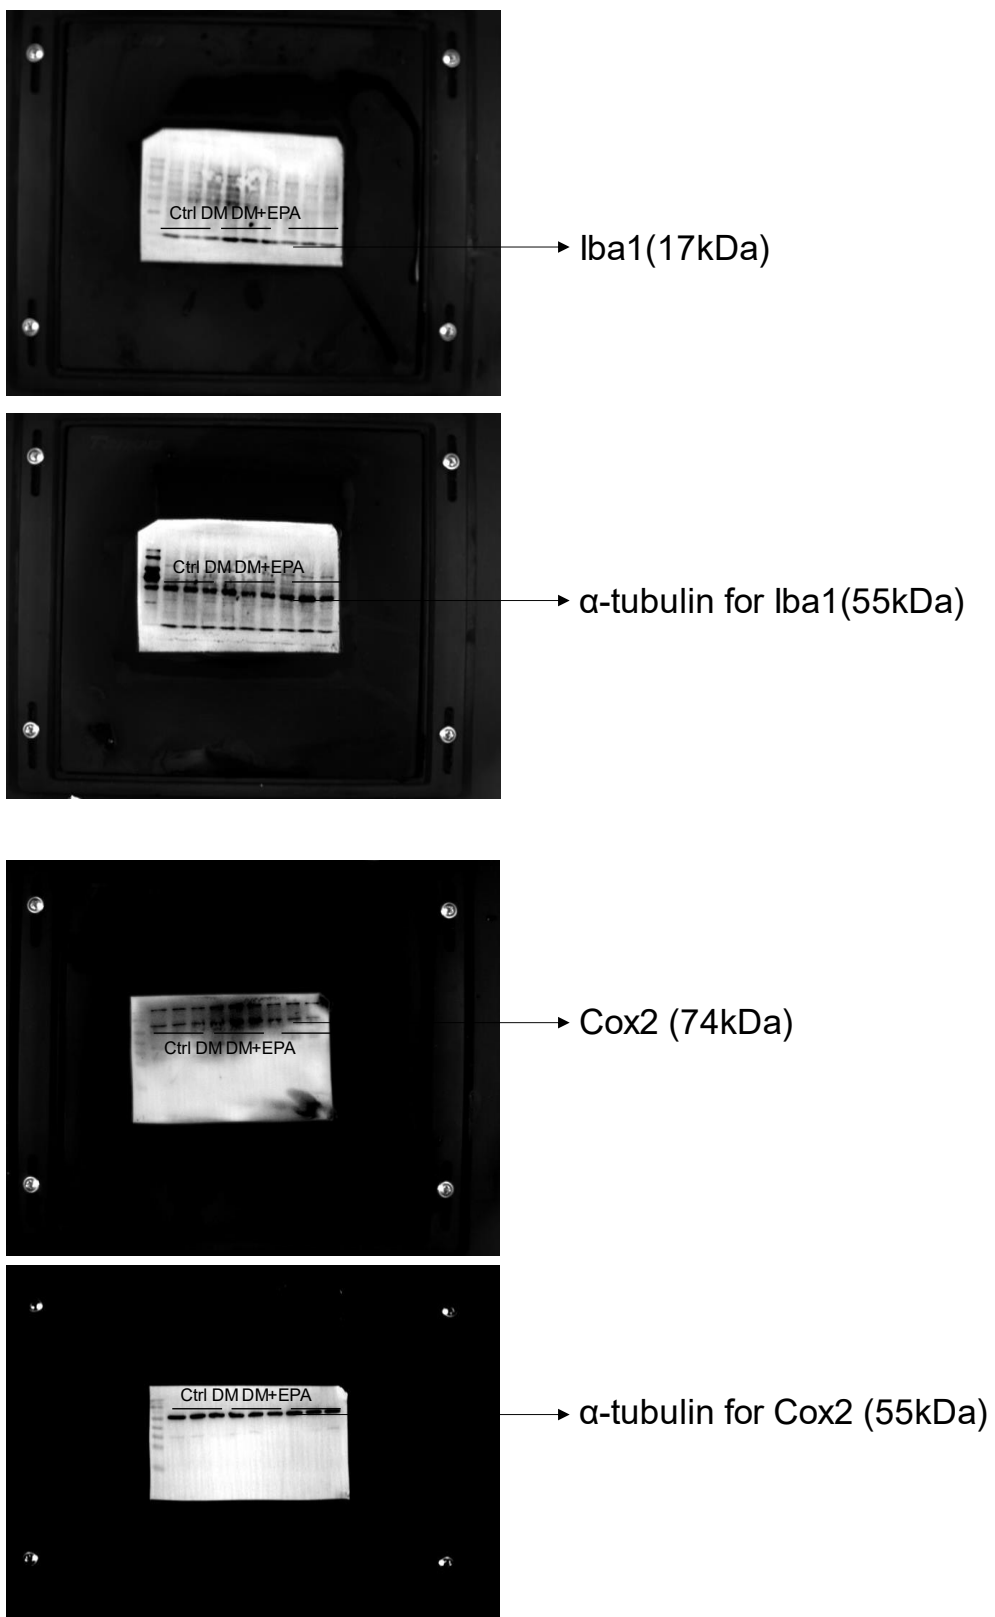

Figure 4

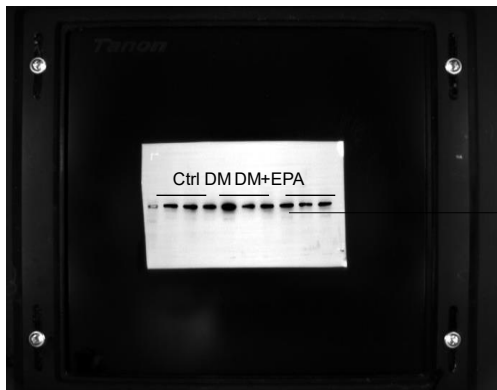

p-P65 (65kDa)

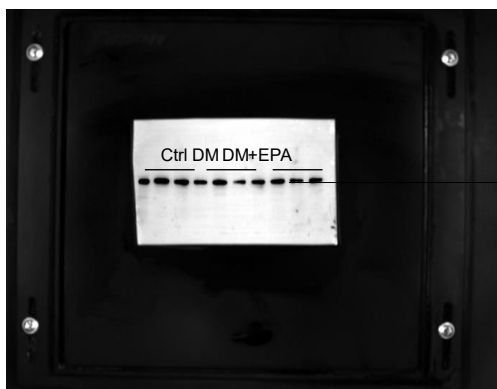

P65 (65kDa)

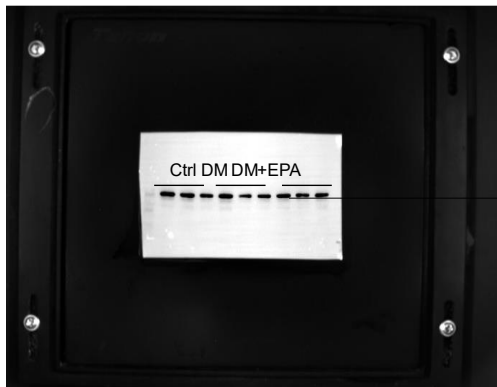

α-tubulin for p-P65/P65 (55kDa)



Figure 4

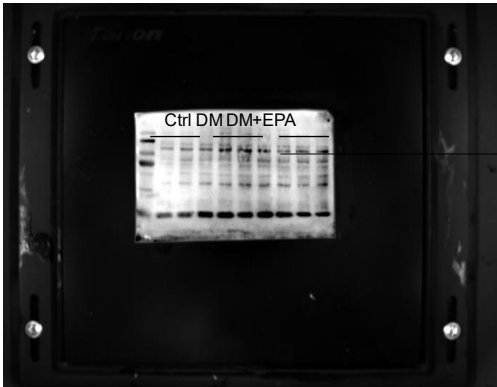

NOX4 (70kDa)

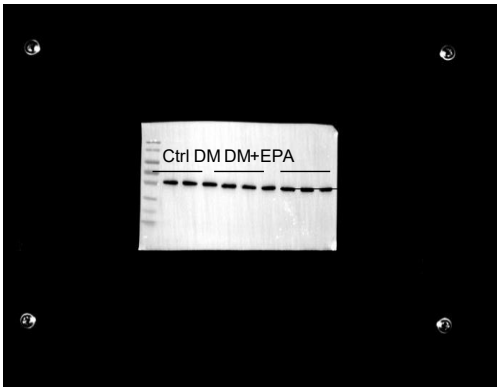

$\alpha$ -tubulin for NOX4 (55kDa)

Figure 5

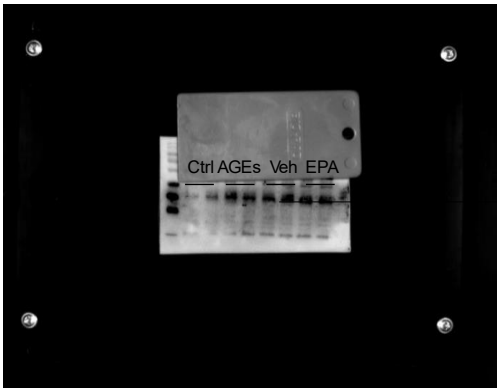

BCL2 (26kDa)

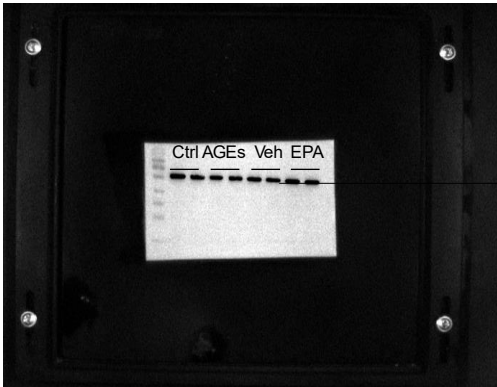

$\alpha$ -tubulin for BCL2 (55kDa)

Figure 5

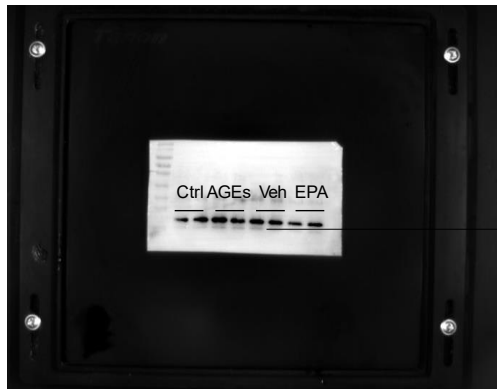

BAX (20kDa)

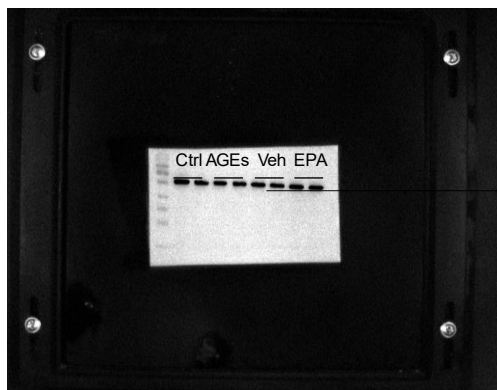

$\alpha$ -tubulin for BAX (55kDa)

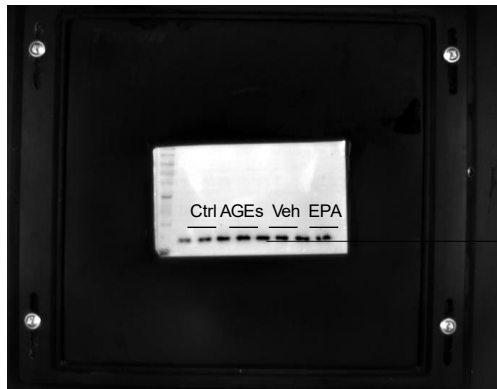

cleaved Caspase3  
(17-19kDa)

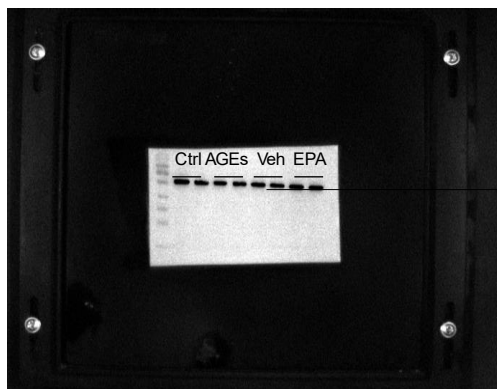

$\alpha$ -tubulin for cleaved  
Caspase3 (55kDa)

Figure 6

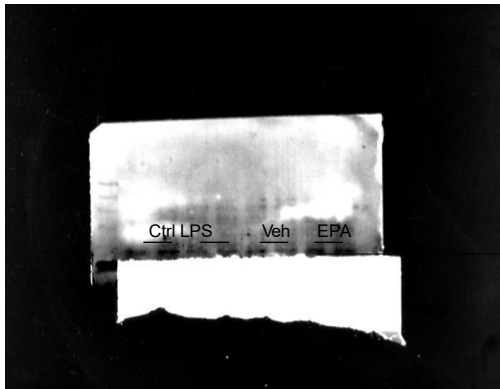

→ BCL2 (26kDa)

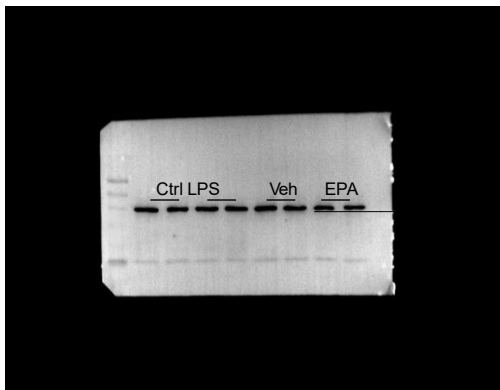

→  $\alpha$ -tubulin for BCL2 (55kDa)

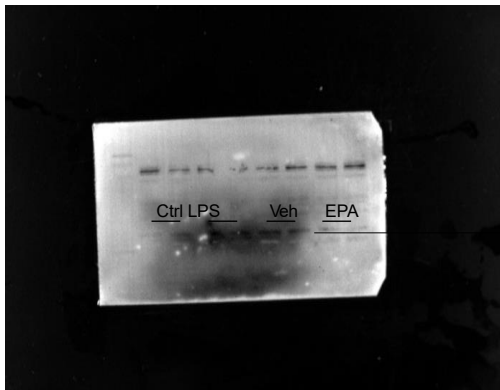

→ BAX (20kDa)

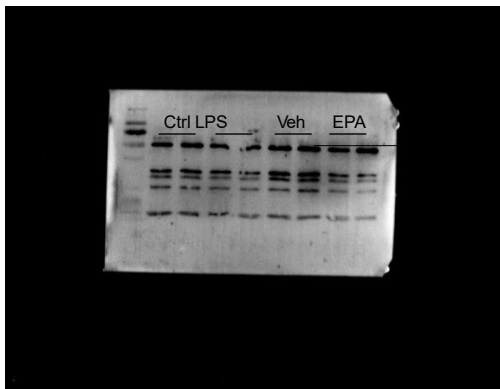

→  $\alpha$ -tubulin for BAX (55kDa)

Figure 6

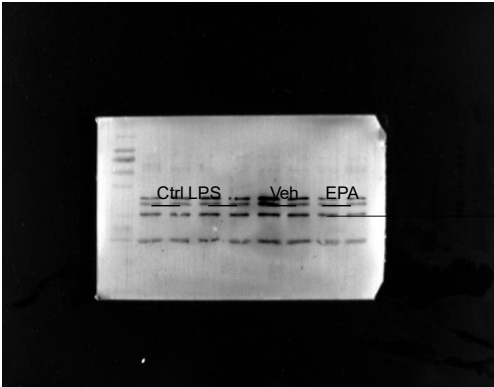

→ cleaved Caspase3 (17-19kDa)

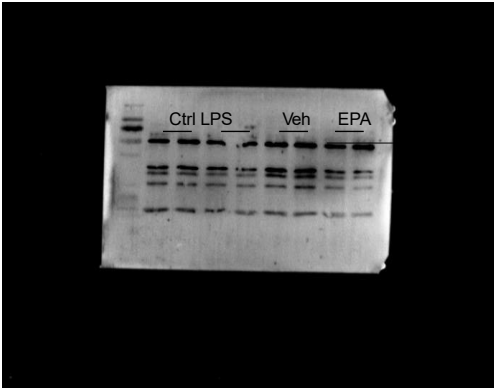

→  $\alpha$ -tubulin for cleaved Caspase3 (55kDa)

Figure 8

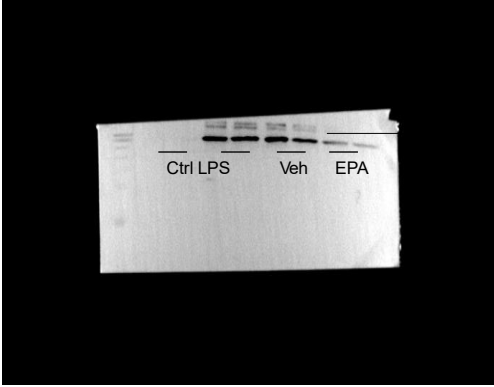

→ Cox2 (74kDa)

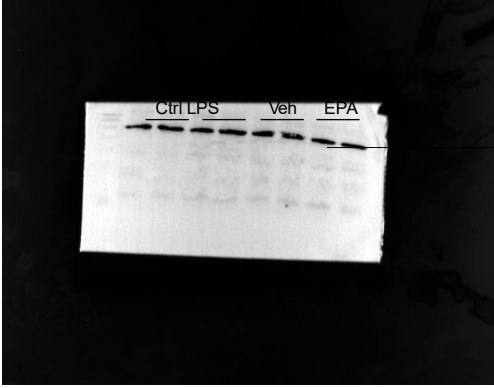

→  $\alpha$ -tubulin for Cox2 (55kDa)

Figure 8

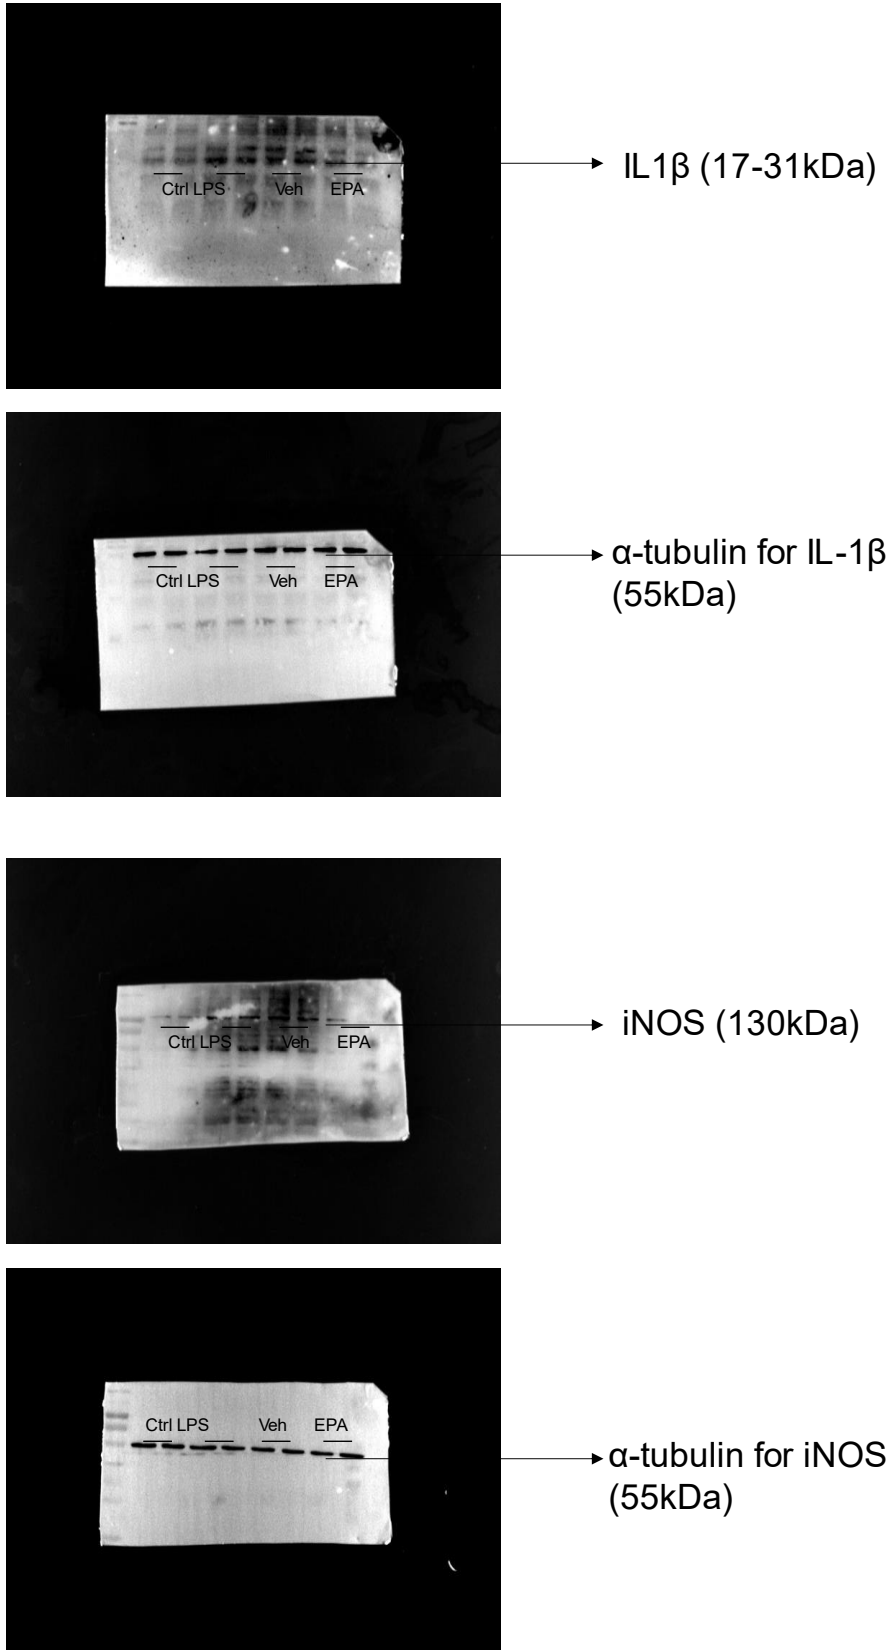

Figure 8

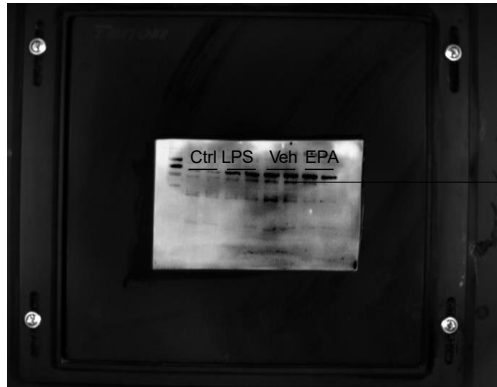

▶ p-JNK (46-54kDa)

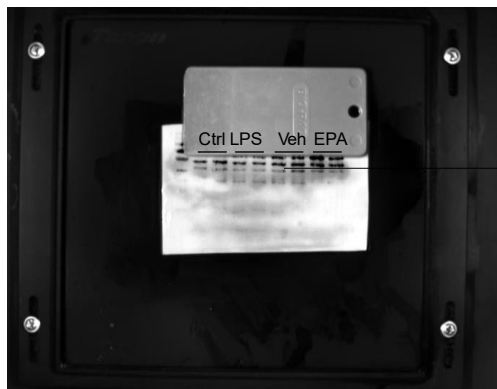

▶ JNK (46-54kDa)

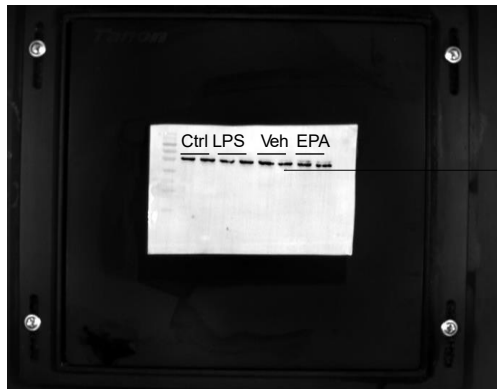

▶  $\alpha$ -tubulin for p-JNK/JNK (55kDa)

Figure 8

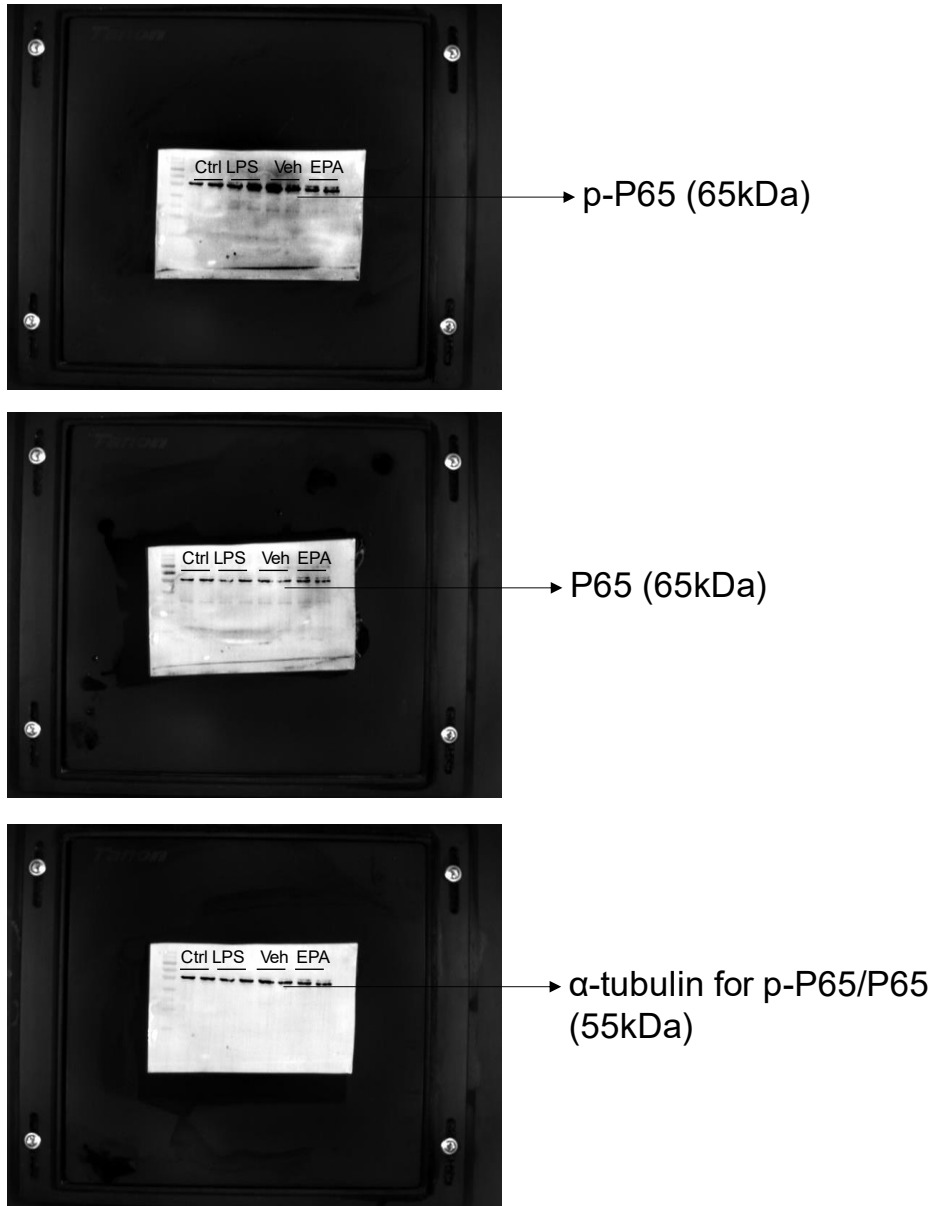

Figure 8

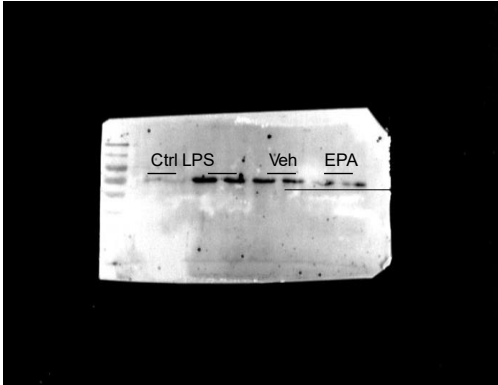

→NOX4 (70kDa)

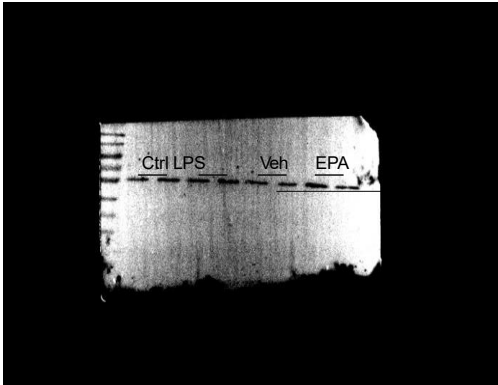

→α-tubulin for NOX4 (55kDa)

Figure 9

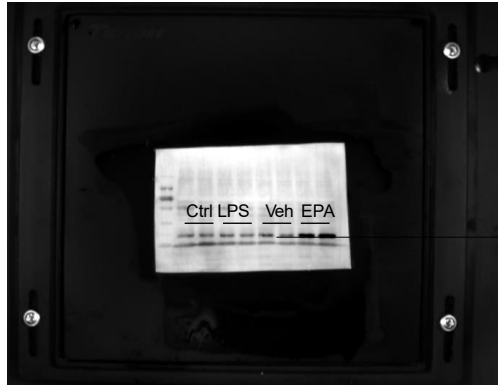

→HO1 (28kDa)

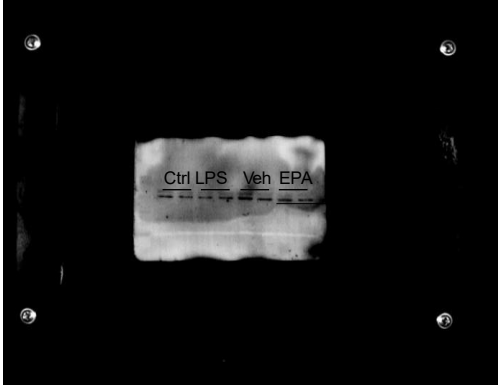

→α-tubulin for HO1(55kDa)



Figure 9

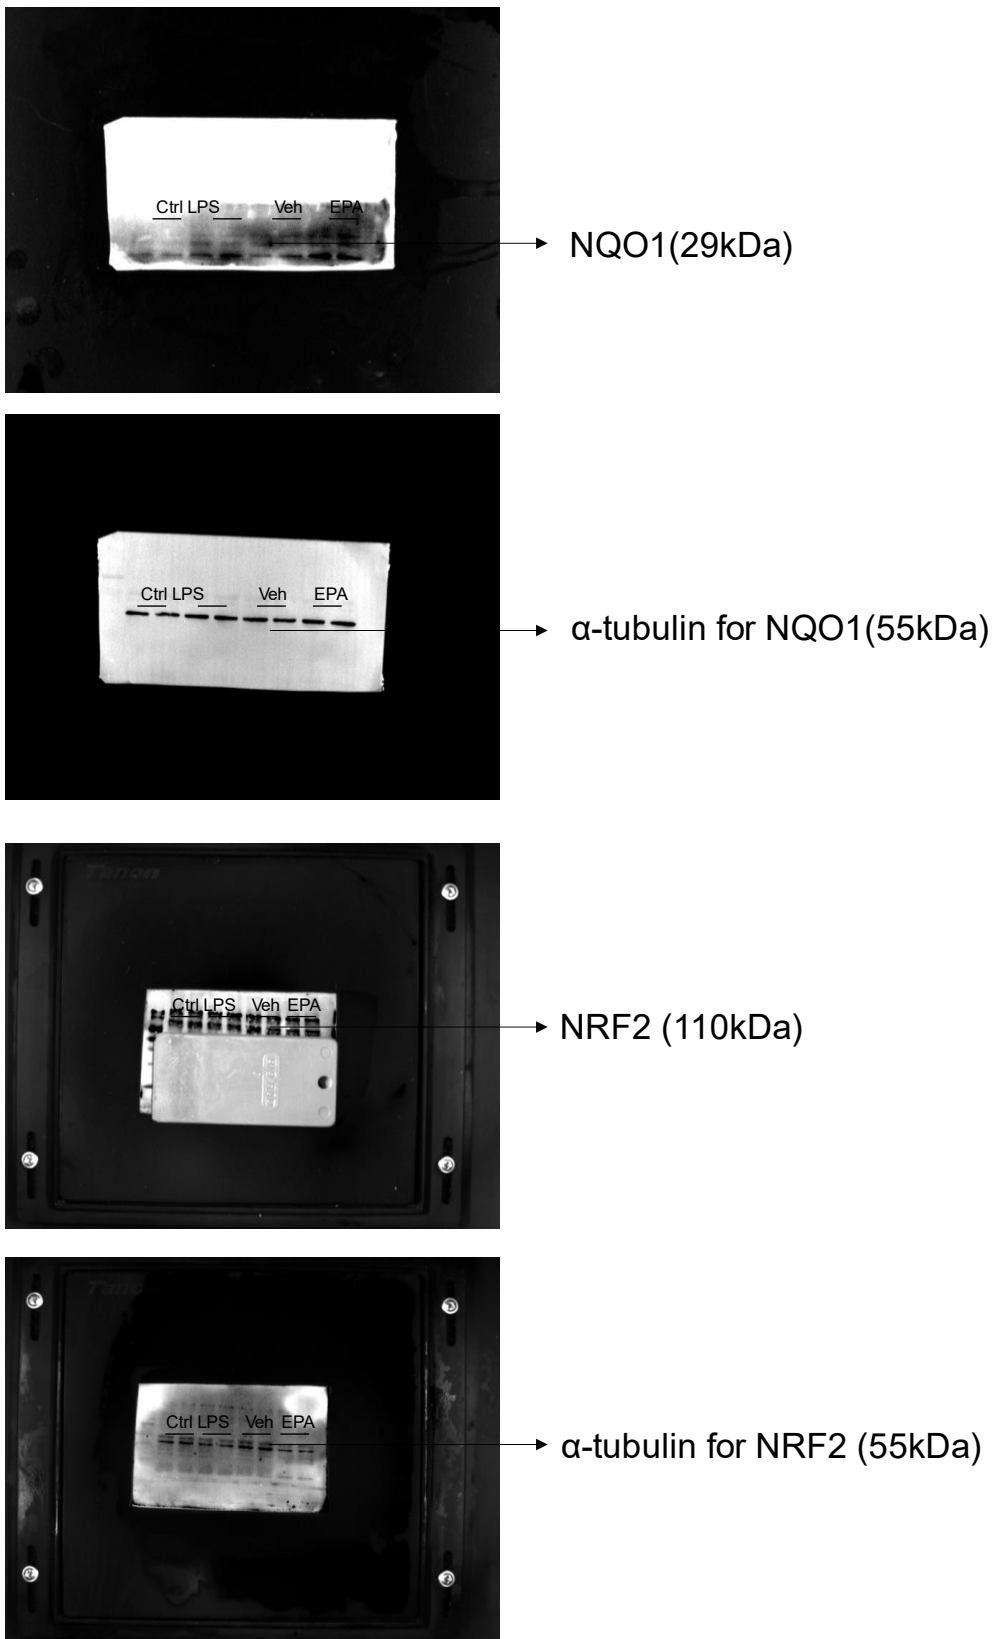

Figure 9

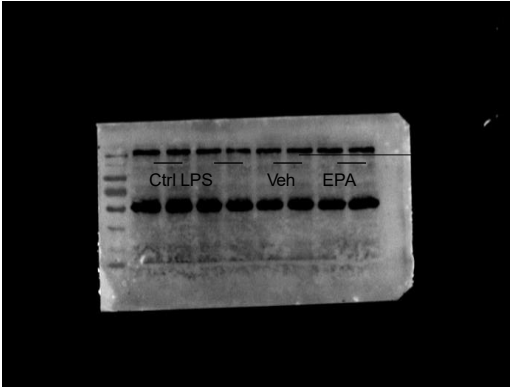

→Cytosolic NRF2 (110kDa)

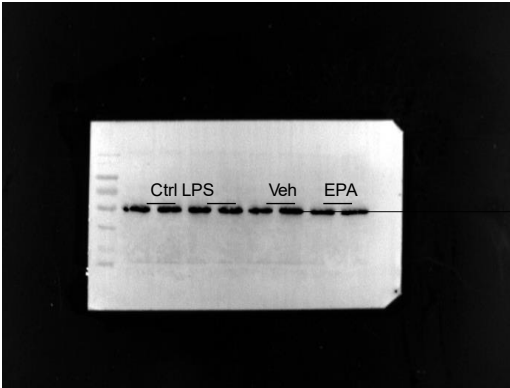

→ $\alpha$ -tubulin for Cytosolic NRF2 (55kDa)

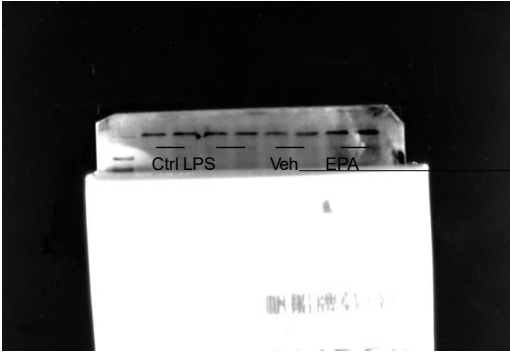

→Nuclear NRF2 (110kDa)

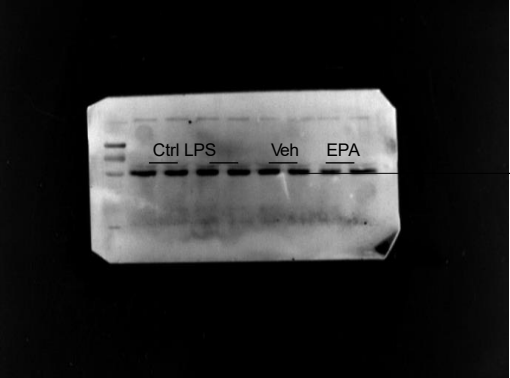

→Lamin B for Nuclear NRF2 (66kDa)

Figure 11

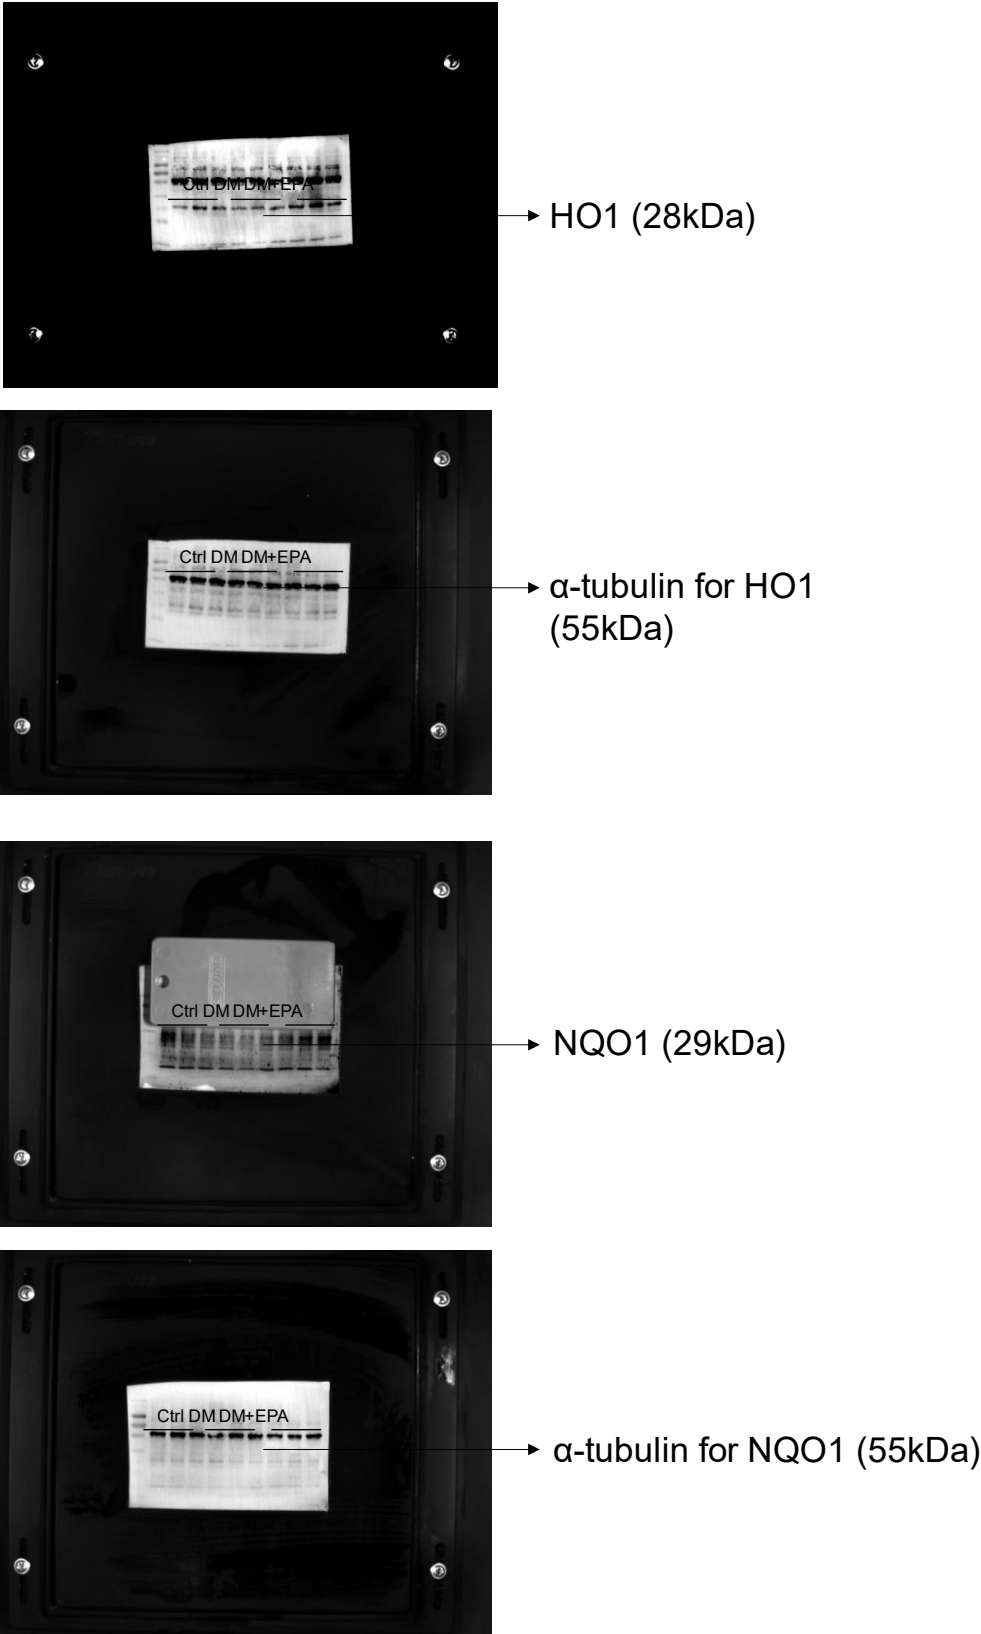

Figure 11

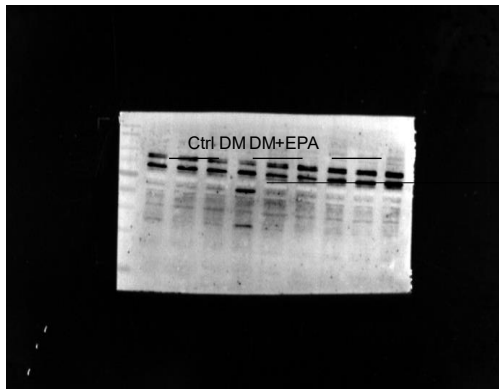

→ KEAP1 (55-70kDa)

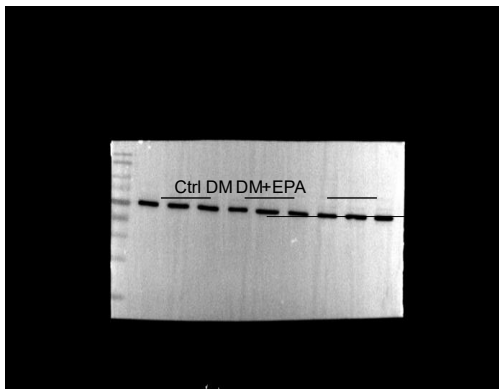

→  $\alpha$ -tubulin for KEAP1 (55kDa)

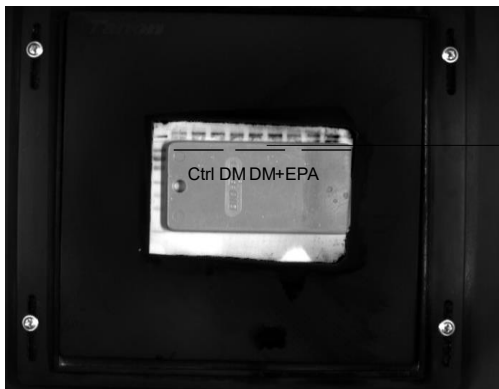

→ NRF2 (110kDa)

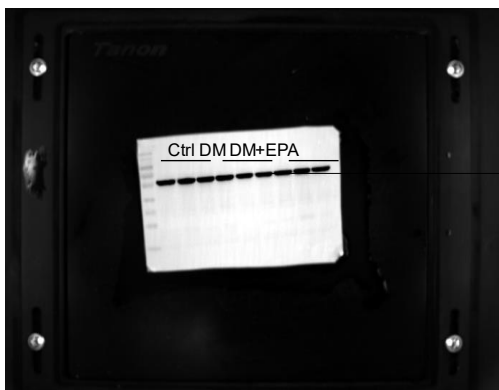

→  $\alpha$ -tubulin for NRF2 (55kDa)

Figure 11

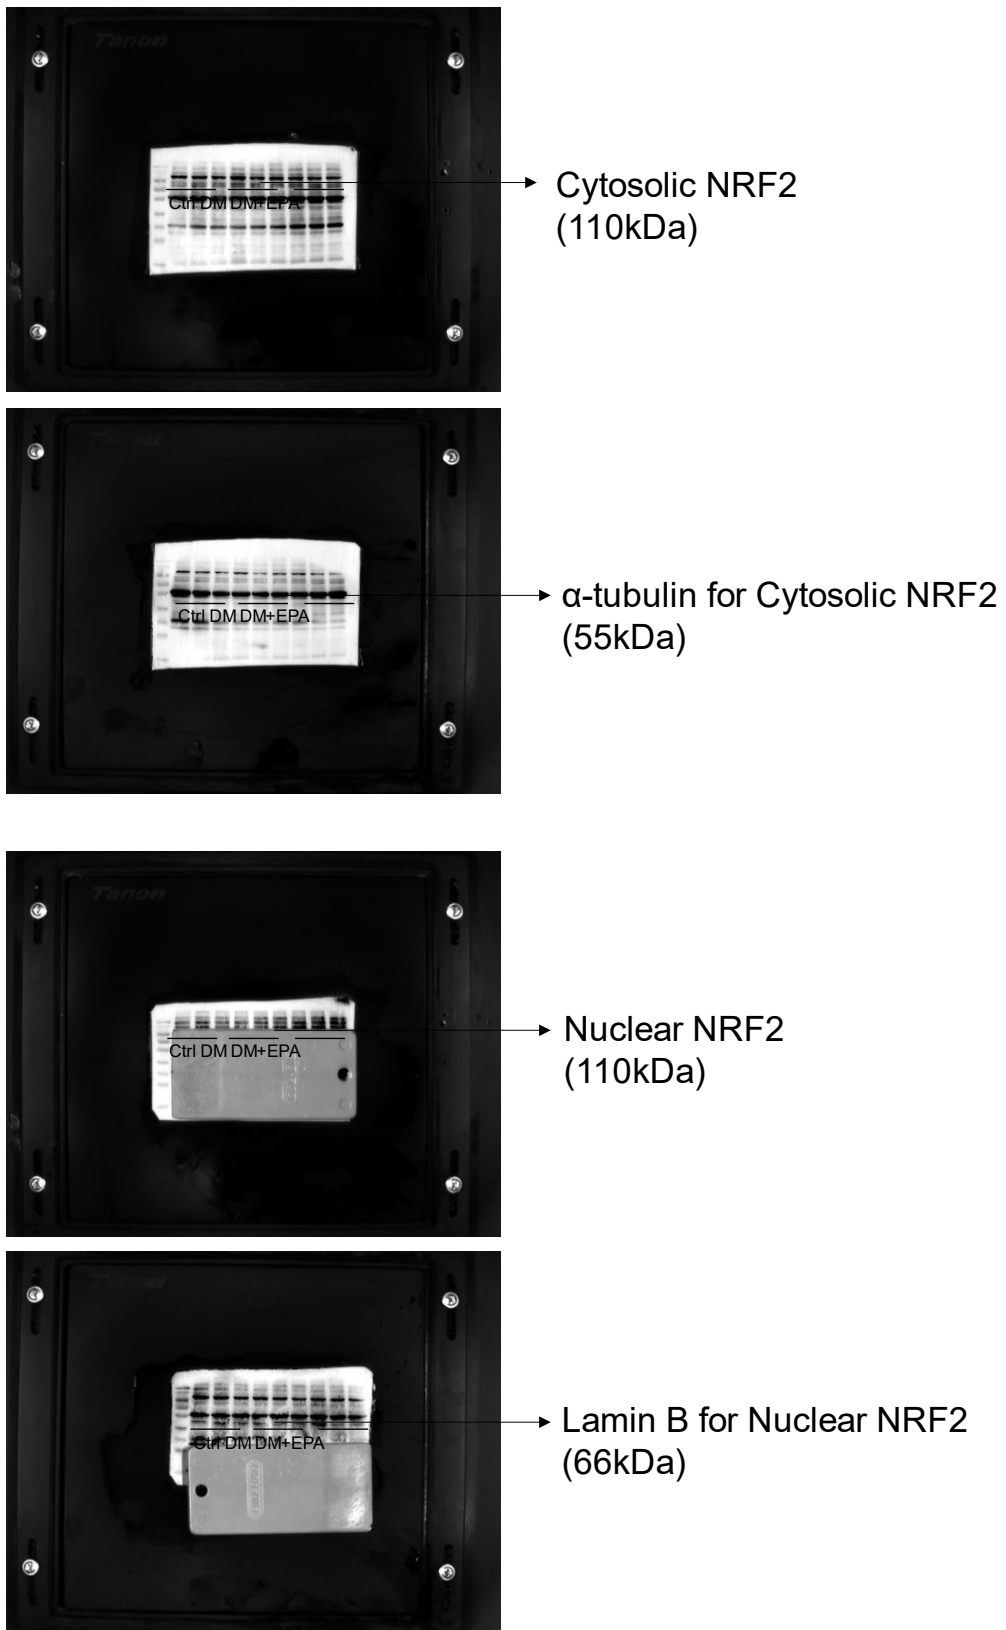

Figure 12

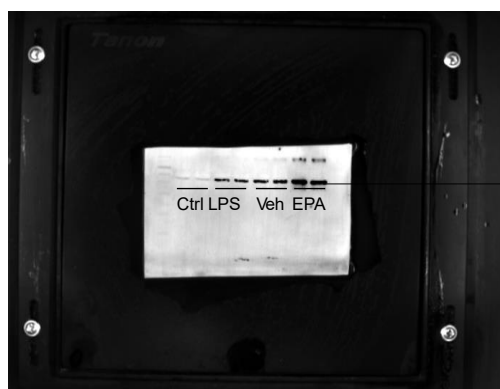

→ P62 (62kDa)

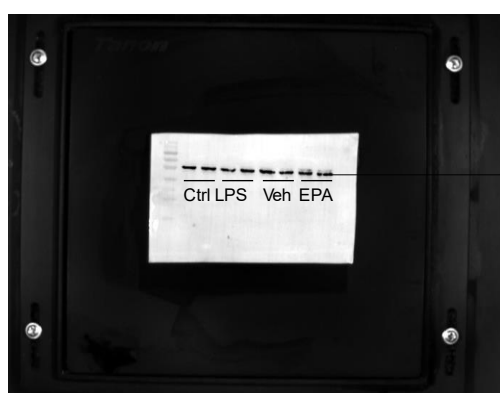

→  $\alpha$ -tubulin for P62 (55kDa)

Figure 13

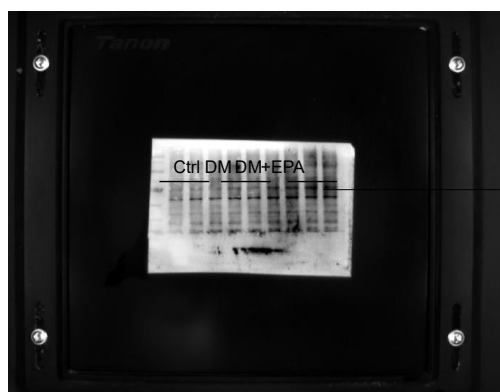

→ P62 (62kDa)

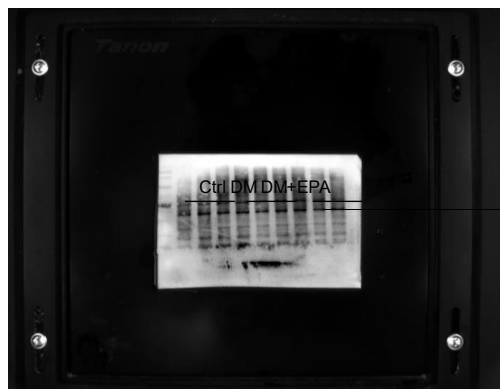

→  $\alpha$ -tubulin for P62 (55kDa)

Figure 13

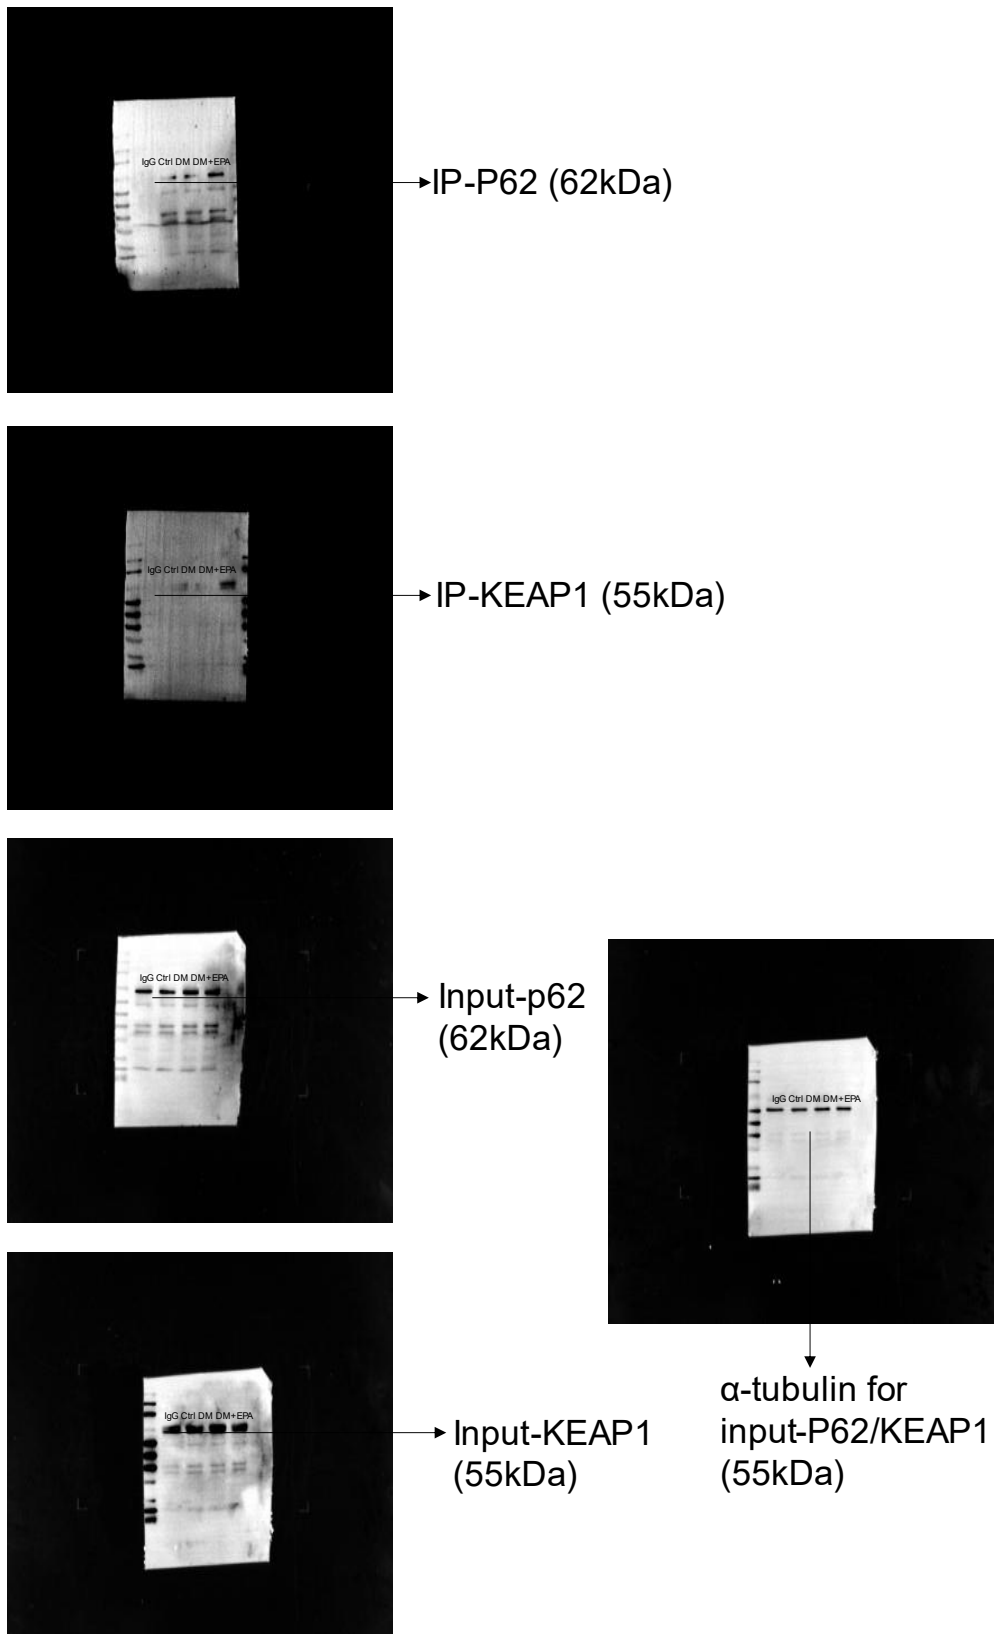

Figure 14

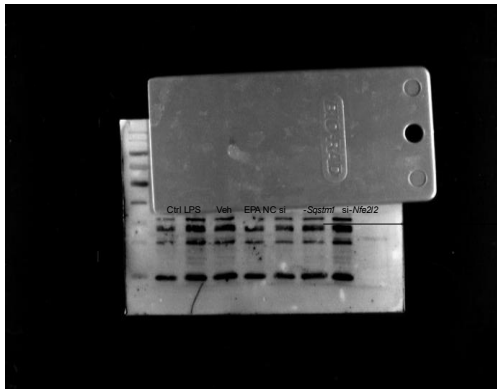

→ IL-1 $\beta$  (31kDa)

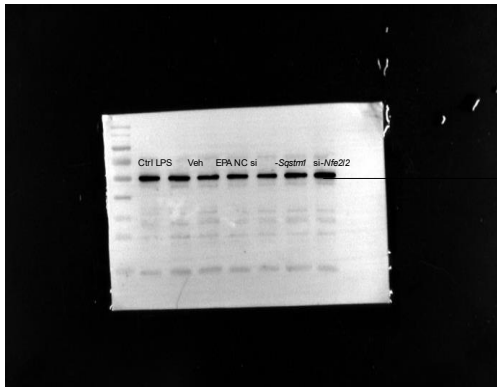

→  $\alpha$ -tubulin for IL-1 $\beta$  (55kDa)

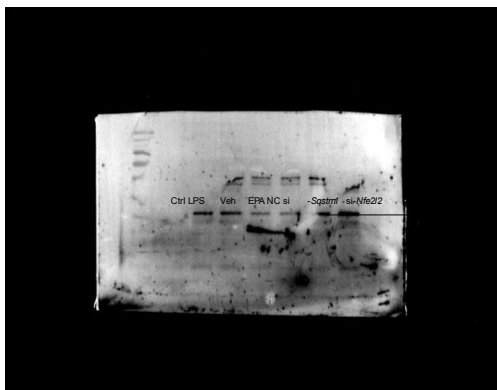

→ IL-6 (24kDa)

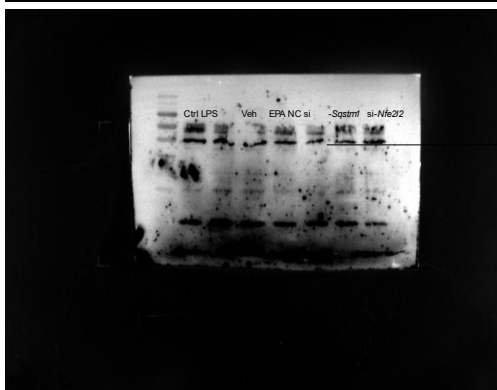

→  $\alpha$ -tubulin for IL-6 (55kDa)



Figure 14

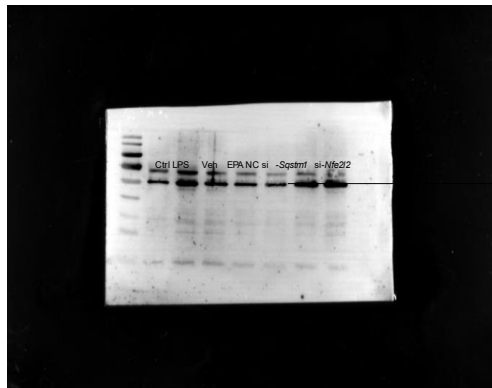

→ p-P65 (65kDa)

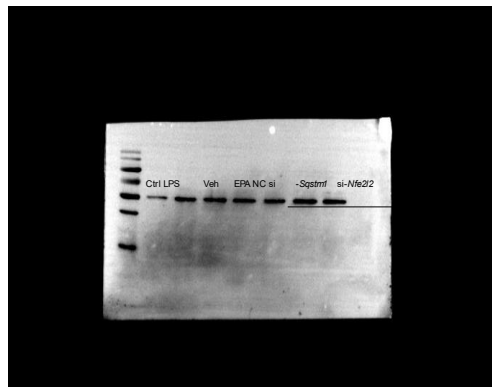

→ P65 (65kDa)

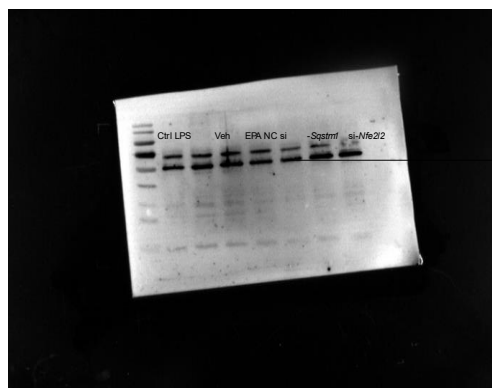

→  $\alpha$ -tubulin for p-P65/P65 (55kDa)

Figure 14

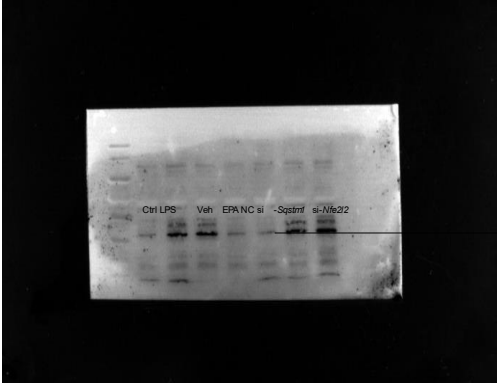

→ p-JNK (46-54 kDa)

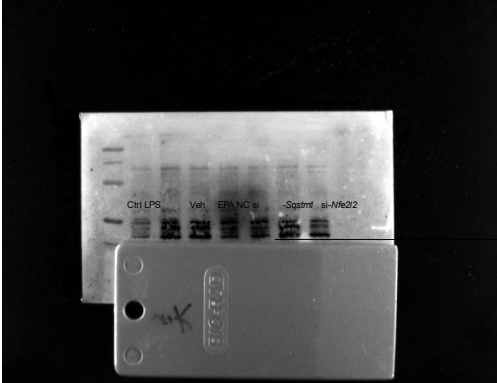

→ JNK (46-54 kDa)

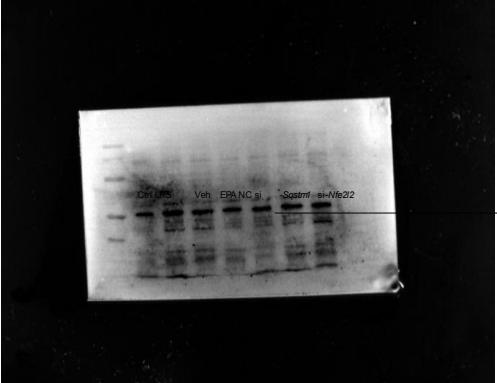

→  $\alpha$ -tubulin for p-JNK/JNK (55kDa)

Figure 14

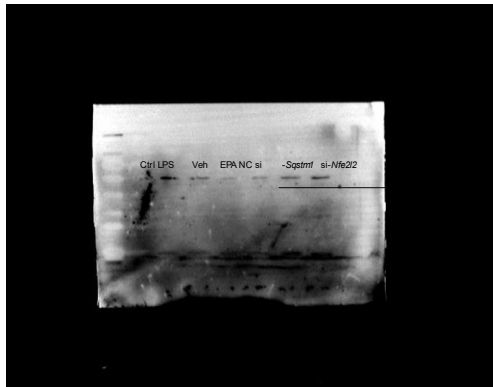

→ NOX4 (70kDa)

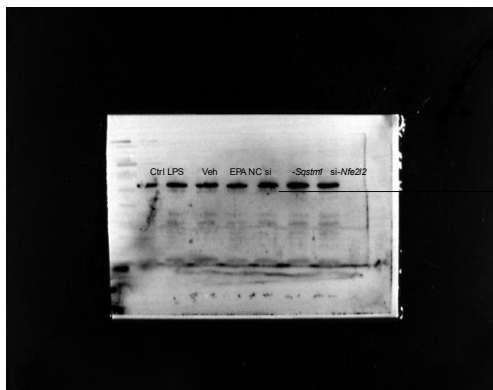

→  $\alpha$ -tubulin for NOX4 (55kDa)

Figure 15

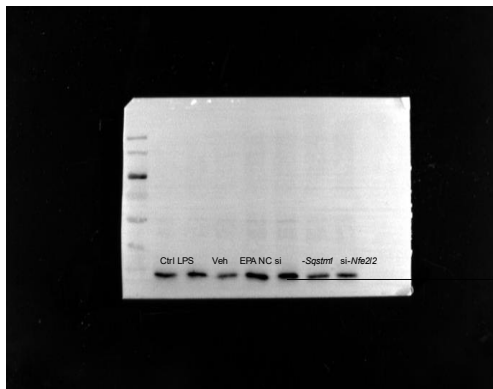

→ HO1 (28kDa)

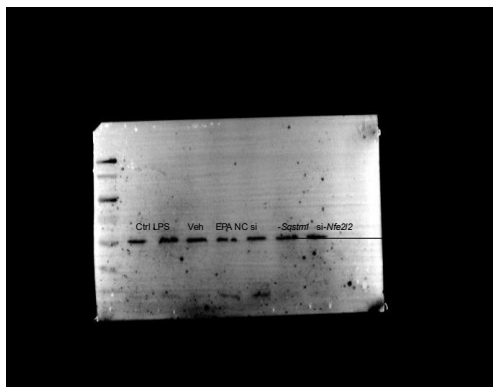

→  $\alpha$ -tubulin for HO1 (55kDa)

Figure 15

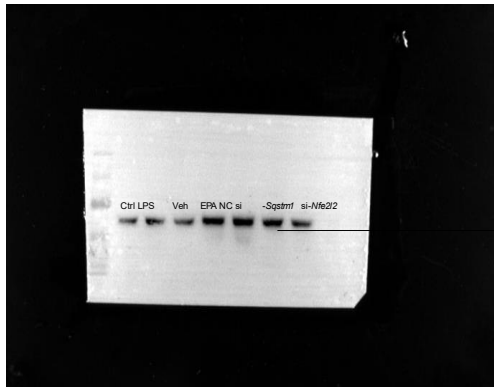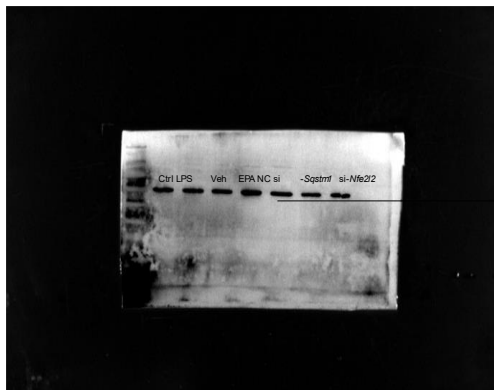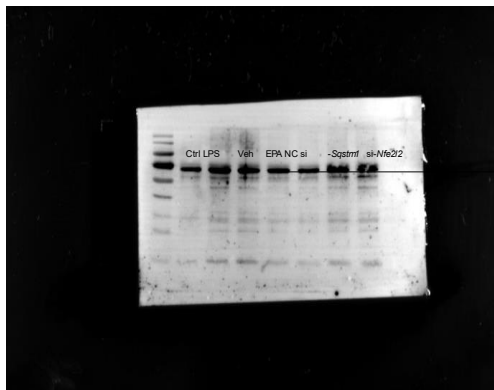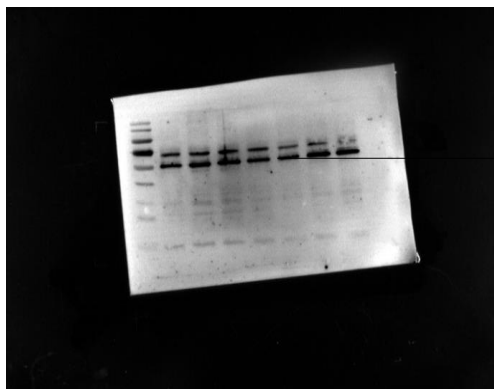

Figure 15

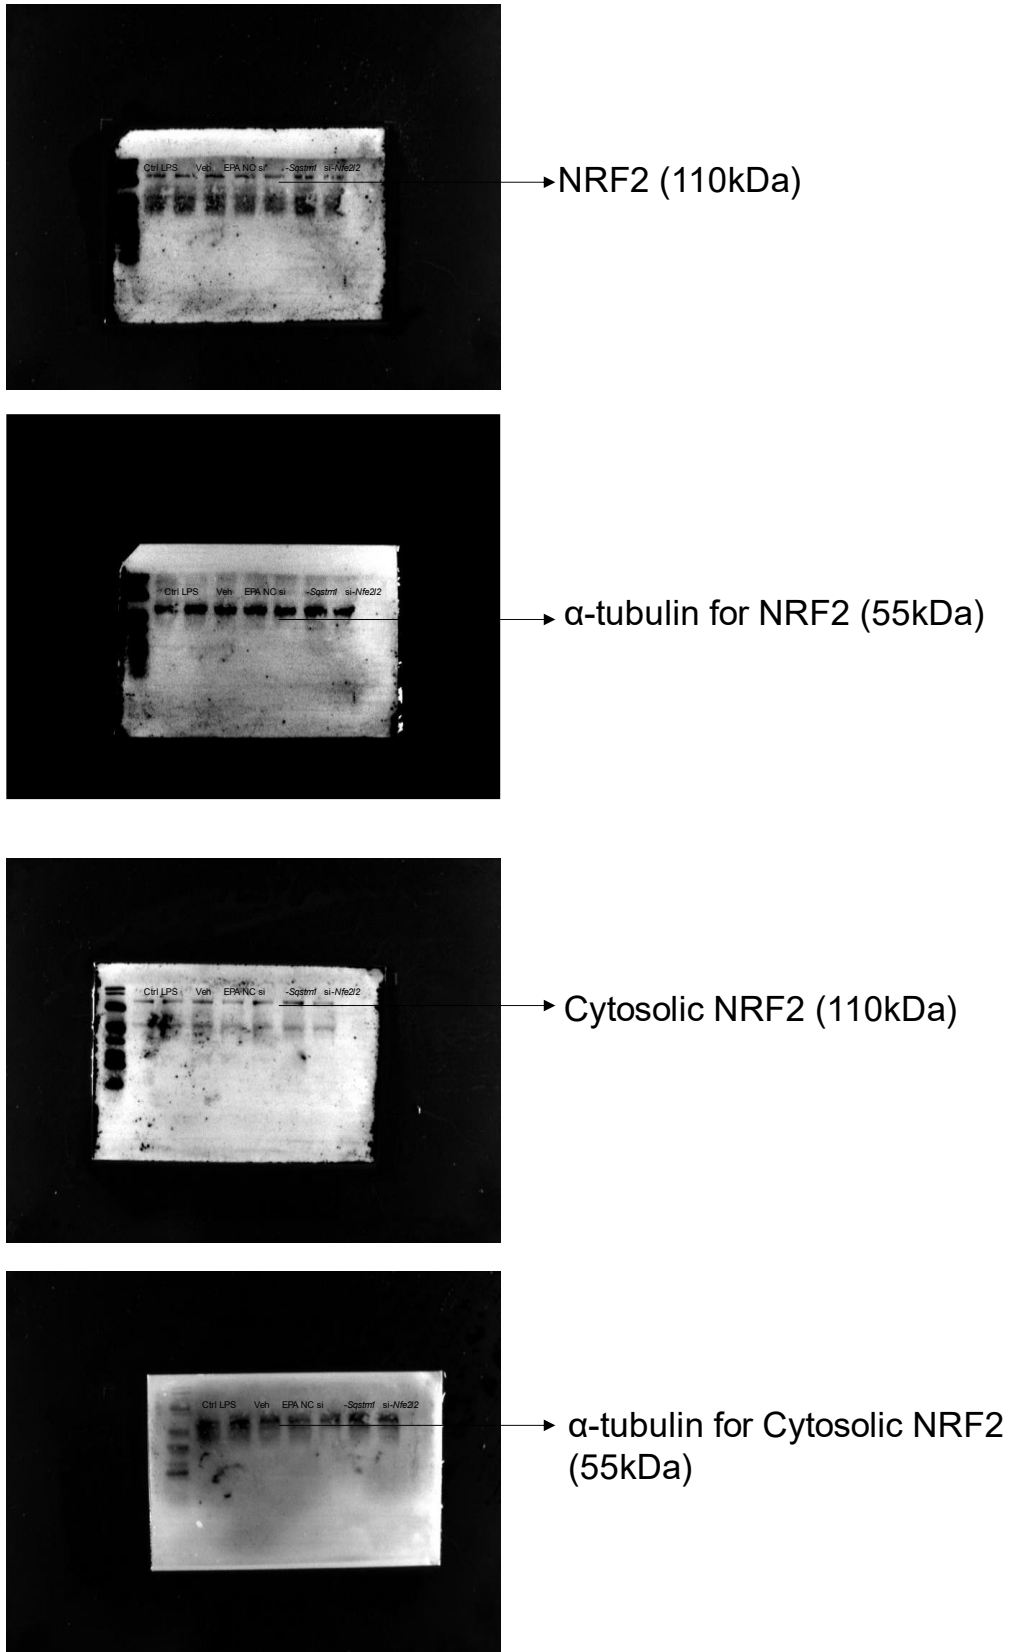

Figure 15

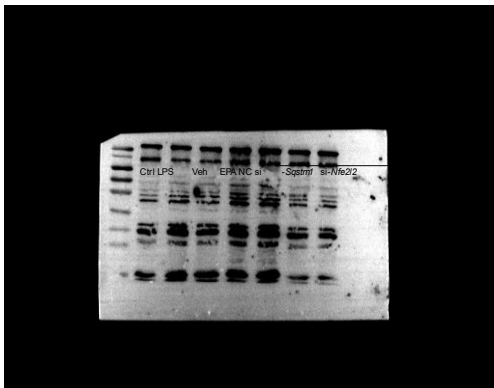

→ Nuclear NRF2 (110kDa)

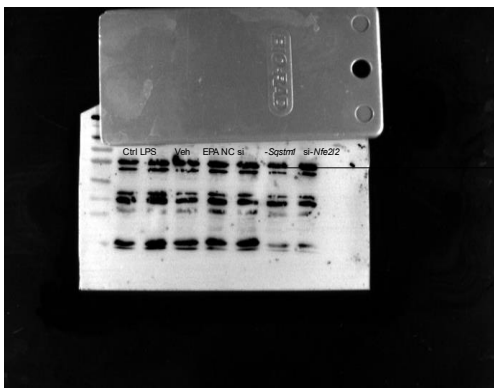

→ Lamin B for Nuclear NRF2 (66kDa)

Figure 16

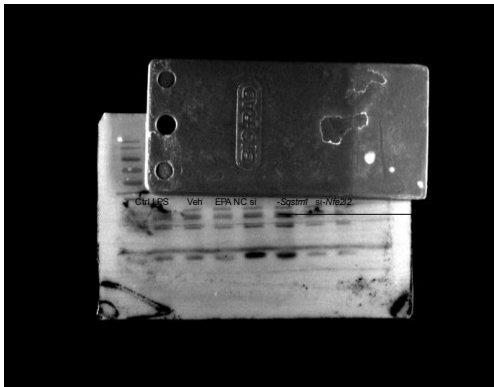

→ BCL2 (26kDa)

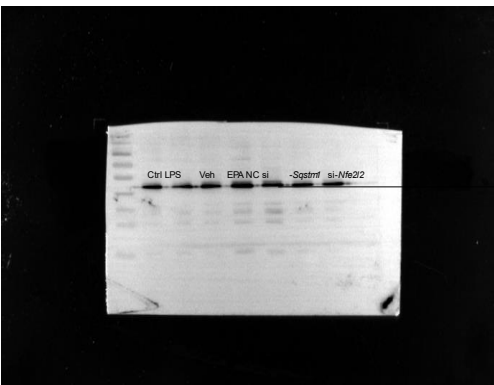

→  $\alpha$ -tubulin for BCL2 (55kDa)

Figure 16

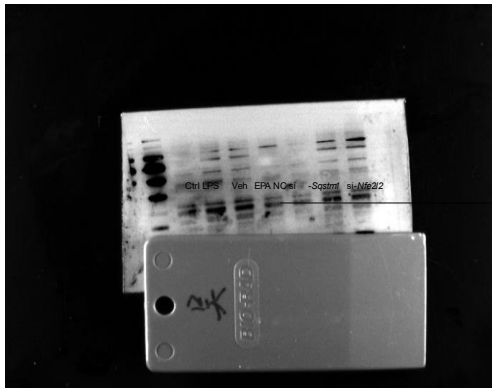

→ BAX (20kDa)

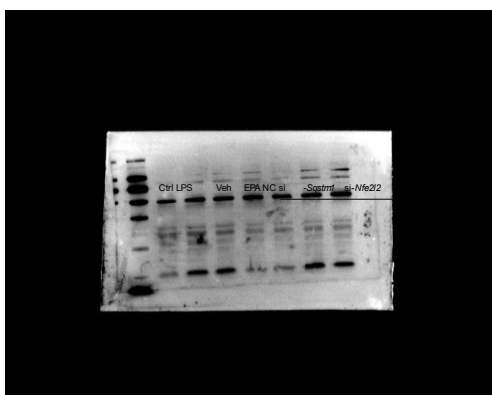

→  $\alpha$ -tubulin for BAX (55kDa)

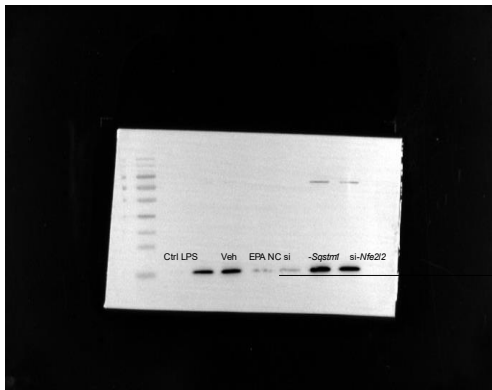

→ cleaved Caspase3  
(17-19 kDa)

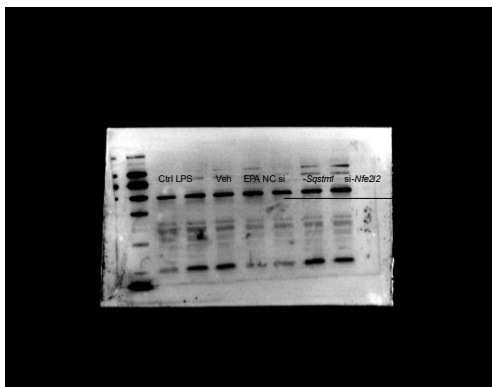

→  $\alpha$ -tubulin for cleaved  
Caspase3 (55kDa)

Figure S2

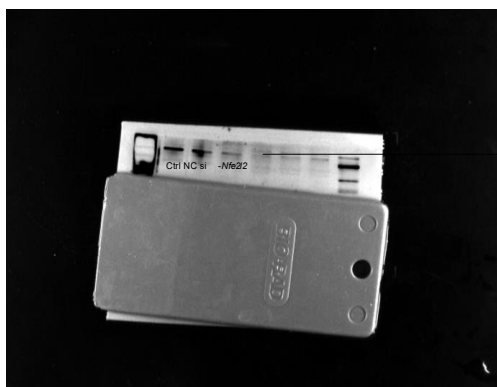

→ NRF2 (110kDa)

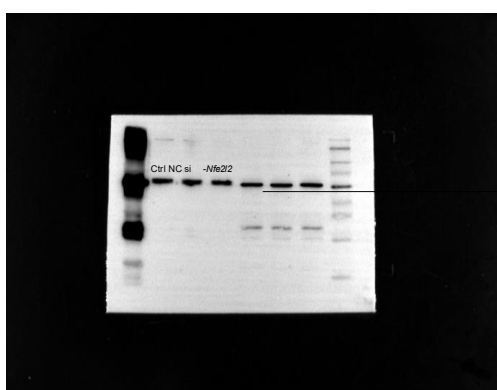

→  $\alpha$ -tubulin for NRF2 (55kDa)

Figure S3

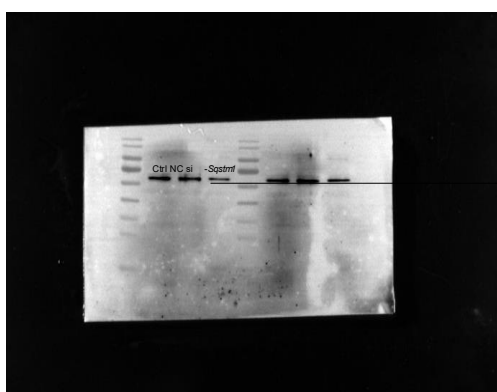

→ P62 (62kDa)

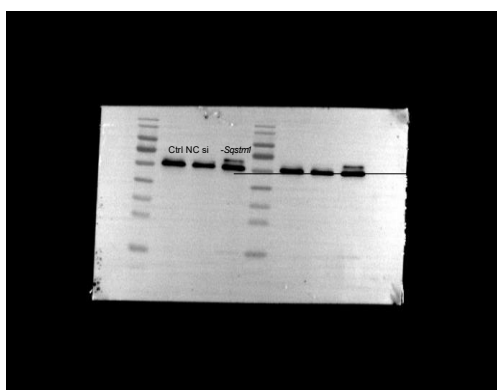

→  $\alpha$ -tubulin for P62 (55kDa)
